# Supplementary material for: Interplay of cell–cell contacts and RhoA/MRTF‐A signaling regulates cardiomyocyte identity
Source: PubMed Central journal article supplement (PMC6003642; doi:10.15252/embj.201798133), 2018-05-15
Supplement: EMBJ-37-e98133-s001.pdf [file EMBJ-37-e98133-s001.pdf]

# Appendix

## **Interplay of cell-cell contacts and RhoA/MRTF signaling regulates cardiomyocytic identity**

Tatjana Dorn, Jessica Haas, Elvira I. Parrotta, Dorota Zawada, Harold Ayetey, Gianluca Santamaria, Laura Iop, Elisa Mastantuono, Daniel Sinnecker, Alexander Goedel, Ralf Dirschinger, Ilaria My, Svenja Laue, Tarik Bozoglu, Christian Baarlink, Tilman Ziegler, Elisabeth Graf, Rabea Hinkel, Giovanni Cuda, Stefan Kääh, Andrew A. Grace, Robert Grosse, Christian Kupatt, Thomas Meitinger, Austin G. Smith, Karl-Ludwig Laugwitz, Alessandra Moretti

### **Content**

**Appendix Figure Legends**

**Appendix Figures S1-8**

**Appendix Tables S1-3**

**Appendix References**

## APPENDIX FIGURES LEGENDS

### Appendix Figure S1. Generation and characterization of PKP2<sup>mut</sup> iPSCs.

- A The table summarizes clinical features and results of genetic screening of the ARVC (PKP2<sup>mut</sup>) patient. The presence of major or minor diagnostic criteria according to the modified ARVC Task Force Criteria (Marcus *et al.*, 2010) is indicated. The total number of major and minor criteria is given in the next-to-last row; a definite diagnosis of ARVC requires the presence of 2 major or 1 major and 2 minor or 4 minor criteria.
- B ARVC (PKP2<sup>mut</sup>) patient harbors a p.V587Afs\*655 heterozygous mutation in the PKP2 protein, caused by a T nucleotide deletion in exon 8, in position 1760 of the *PKP2* coding region, resulting in a shift of the reading frame and generation of premature translation termination at the amino acid position 655.
- C-G Reprogramming of PKP2<sup>mut</sup> patient skin keratinocytes to iPSCs. Representative images of skin keratinocytes, early and late passage iPSCs from PKP2<sup>mut</sup> patient indicating that, after infection with Sendai viruses encoding for OCT4, SOX2, KLF4 and c-MYC, keratinocytes and freshly generated iPSCs express Sendai viral HN proteins, detected by immunofluorescence, while longer passaged iPSCs lack Sendai cell surface antigens. Scale bars, 100  $\mu$ m (left and middle panels), 200  $\mu$ m (right panels) (C). iPSCs express the pluripotency markers NANOG (red) and TRA1-81 (green). Scale bar, 100  $\mu$ m (D). RT-PCR analysis confirms reactivation of endogenous pluripotency genes (E) and loss of Sendai viral transgenes in iPSCs (F). PSK indicates parental skin keratinocytes, iPSK infected parental skin keratinocytes (E, F). Karyotyping of PKP2<sup>mut</sup>-iPSCs revealed normal karyotypes (G).
- H-I Pluripotency assays in PKP2<sup>mut</sup>-iPSCs. *In vitro* differentiation of iPSCs into ectoderm (NESTIN- and TUJ1-positive neuronal cells), mesoderm (cardiac troponin T-positive myocytes) and endoderm (Sox17-positive cells). Shown

are representative images from differentiated PKP2<sup>mut</sup>-iPSCs. Scale bars, 100  $\mu$ m (left and middle panels), 150  $\mu$ m (right panels) (H). Teratoma assay for pluripotency. Teratomas containing all three germ layers were generated from PKP2<sup>mut</sup>-iPSC line. Scale bar, 200  $\mu$ m (I).

**Appendix Figure S2. Induction of lineage tracing at E7.5 is specific and mG-marked cells in *Wt1*<sup>CreERT2/+</sup>;*R26*<sup>mTmG/+</sup> are true proepicardial progenitors.**

- A Immunostaining of alpha smooth muscle actin ( $\alpha$ -SMA, magenta), Vimentin (VIM, magenta), mG (green), and mT (red) in sections of the *Wt1*<sup>CreERT2/+</sup>;*R26*<sup>mTmG/+</sup> mouse hearts at P28 after tamoxifen treatment at embryonic day E7.5 (E7.5). Expression of mG was observed in proepicardium-derived lineages of  $\alpha$ -SMA<sup>+</sup> smooth muscle (upper panels) and VIM<sup>+</sup> epicardial (middle panels) and cardiac fibroblasts (lower panels), as indicated by the white arrows. Scale bars, 25  $\mu$ m. Regions specified by white boxes are shown in higher magnification panels on the right; scale bars, 10  $\mu$ m.
- B Top, schematic representation of control experimental setup with oil injection in *Isl1*<sup>MerCreMer/+</sup>;*R26*<sup>mTmG/+</sup> or *Wt1*<sup>CreERT2/+</sup>;*R26*<sup>mTmG/+</sup> mice at 7.5 and their analysis at postnatal day 28 (P28). Immunostaining of PLIN1 (magenta), cTNT (magenta), mG (green) and mT (red) in *Isl1*<sup>MerCreMer/+</sup>;*R26*<sup>mTmG/+</sup> (left) and *Wt1*<sup>CreERT2/+</sup>;*R26*<sup>mTmG/+</sup> (right) with oil injection at E7.5 shows no mG signal throughout the whole heart. Nuclei are stained with Hoechst 33258 (blue). Scale bars, 400  $\mu$ m. Framed areas are shown in higher magnifications below (a-d). Representative areas of cTNT<sup>+</sup> (magenta) CMs (a and c) and PLIN1<sup>+</sup> (magenta) epicardial adipocytes (b and d) of *Isl1*<sup>MerCreMer/+</sup>;*R26*<sup>mTmG/+</sup> (a and b) and *Wt1*<sup>CreERT2/+</sup>;*R26*<sup>mTmG/+</sup> (c and d) mouse hearts. Scale bars, 25  $\mu$ m. Labelling: ra, right atrium; rv, right ventricle; la, left atrium; lv, left ventricle.

**Appendix Figure S3. No activation of Cre in the absence of tamoxifen in *Isl1*<sup>MerCreMer/+</sup>;*R26*<sup>mTmG/+</sup> and *Wt1*<sup>CreERT2/+</sup>;*R26*<sup>mTmG/+</sup> mouse embryos at E9.5.**

Top, schematic representation of a control experimental setup with oil injection in *Isl1*<sup>MerCreMer/+</sup>;*R26*<sup>mTmG/+</sup> and *Wt1*<sup>CreERT2/+</sup>;*R26*<sup>mTmG/+</sup> mice at E7.5 and their analysis at E9.5. Immunostaining of cTNT (magenta), mG (green) and mT (red) in *Isl1*<sup>MerCreMer/+</sup>;*R26*<sup>mTmG/+</sup> (left) and *Wt1*<sup>CreERT2/+</sup>;*R26*<sup>mTmG/+</sup> (right) with oil injection at E7.5 shows no mG signal throughout the whole embryo. Nuclei are stained with Hoechst 33258 (blue). Scale bars, 100  $\mu$ m. Framed areas are shown in higher magnification below (a-f). Representative areas of *Isl1*<sup>+</sup> SHF progenitors (magenta) (a), *Wt1*<sup>+</sup> PEO progenitors (b and e) and epicardial cells (d) (both magenta), and cTNT<sup>+</sup> CMs (magenta) (c and f) in *Isl1*<sup>MerCreMer/+</sup>;*R26*<sup>mTmG/+</sup> (a-c) and *Wt1*<sup>CreERT2/+</sup>;*R26*<sup>mTmG/+</sup> (d-f) embryos. Scale bars, 25  $\mu$ m. Arrowheads indicate *Isl1*<sup>+</sup> progenitors in a and *Wt1*<sup>+</sup> epicardial and proepicardial cells in b and e.

**Appendix Figure S4. *Isl1*<sup>+</sup>/*Wt1*<sup>+</sup>-derived CMs are prone to adipogenesis in response to proadipogenic cues.**

- A Scheme of the experimental setup for testing susceptibility to adipogenesis of mouse ESC-derived *Isl1*<sup>+</sup> clones.
- B Representative immunofluorescence images of CMs derived from *Isl1*<sup>+</sup>/*Wt1*<sup>+</sup> (left) and *Isl1*<sup>+</sup>/*Wt1*<sup>-</sup> (right) clones after 14 days culture in adipogenic medium and stained with cTNT (green) and lipid marker LipidTOX (red). Nuclei are stained with Hoechst 33258 (blue). Scale bars, 25  $\mu$ m.
- C Summary of the percentage of cTNT<sup>+</sup>/LipidTOX<sup>-</sup> and cTNT<sup>+</sup>/LipidTOX<sup>+</sup> CMs derived from *Isl1*<sup>+</sup>/*Wt1*<sup>+</sup> and *Isl1*<sup>+</sup>/*Wt1*<sup>-</sup> clones.

**Appendix Figure S5. Characterization of NLS-WT1 and PPAR $\gamma$  overexpression in wt CMs.**

- A Drawings depict the lentiviral constructs used for expression of nuclear-tagged form of WT1 (NLS-WT1) and the corresponding control GFP vector.

Immunofluorescence analysis of wt CMs 7 days after infection with GFP and NLS1-WT1 lentivirus demonstrates expression of nuclear WT1 (magenta) only in NLS-WT1 transduced GFP<sup>+</sup> cells, as indicated by arrows. Phalloidin marks F-actin (red). Nuclei are stained with Hoechst 33258 (blue). Scale bars, 25  $\mu$ m.

- B Drawings depict the lentiviral constructs used for PPAR $\gamma$  overexpression and the corresponding control GFP vector. Immunofluorescence analysis of wt CMs 7 days after infection with GFP and PPAR $\gamma$  lentivirus demonstrates PPAR $\gamma$  expression in PPAR $\gamma$ -transduced GFP<sup>+</sup> cells, as indicated by arrows. CMs are visualized with cTNT (red). Nuclei are stained with Hoechst 33258 (blue). Scale bars, 25  $\mu$ m.
- C qRT-PCR analysis of myocytic and adipocytic genes shows similar expression levels in wt CMs transduced with control GFP (black bars) and NLS-WT1 (blue bars) lentivirus over time in culture. Expression values are normalized to *GAPDH*; n=2.
- D Immunostaining shows activation of CEBP $\alpha$  (red) expression in PPAR $\gamma$  (magenta) transduced wt CMs within 7 days. Phalloidin marks F-actin (green). Nuclei are stained with Hoechst 33258 (blue). Scale bars, 25  $\mu$ m.

**Appendix Figure S6. Validation of shRNA targeting WT1 and analysis of scramble-shRNA/PPAR $\gamma$  overexpressing CMs.**

- A qRT-PCR analysis of *WT1* expression reveals decreased *WT1* transcript in wt CMs 7d after infection with a lentiviral construct encoding a shRNA targeting WT1 (shWT1). n=4 ; \**P*<0.01 vs scramble; t-test.
- B Left, Western blotting using an antibody directed against WT1 demonstrates reduced expression of WT1 protein (30 kDa) in total lysates of wt CMs 7 days after infection with shWT1 lentivirus. Actin is shown as a loading control. Right, densitometric readings reveal an almost 80% knock-down of WT1 in shWT1-infected wt CMs compared to scramble control. Values are expressed

as the integrals (area x mean density) of each band normalized to actin and relative to scramble; n=3; \* $P$ <0.05 vs scramble; t-test.

- C Scrambled shRNA has no effect on PPAR $\gamma$ -induced conversion of wt CMs as shown by immunocytochemistry after lentiviral overexpression of PPAR $\gamma$  and scrambled shRNA (Scramble/PPAR $\gamma$ OE) or PPAR $\gamma$  alone (PPAR $\gamma$ OE) at 14 (upper panels) and 21 (lower panels) days following infection. Both constructs express GFP simultaneously. Representative images show GFP (green, left panels) and cTNT (blue) in conjunction with lipid stain ORO (red, right panels) in the same cells. Scale bars, 50  $\mu$ m.
- D qRT-PCR analysis of myocytic and adipocytic genes shows similar expression levels in PPAR $\gamma$ OE or Scramble/PPAR $\gamma$ OE conditions at the indicated time points; n=3 (PPAR $\gamma$ OE) and n=4 (Scramble/PPAR $\gamma$ OE).

**Appendix Figure S7. Endogenous and forced expression of MRTF-A in PKP2<sup>mut</sup> and wt CMs.**

- A Immunofluorescence analysis of MRTF-A (red) in wt and PKP2<sup>mut</sup> CMs at 0d, 1d, and 5d of culture reveals similar pancellular expression pattern between the two groups. cTNT (green) marks CMs. Nuclei are stained with Hoechst 33258 (blue). Scale bars, 25  $\mu$ m.
- B PKP2<sup>mut</sup> CMs 14d after infection with doxycycline-inducible GFP-MRTF-A lentivirus and continuous doxycycline treatment demonstrate cytoplasmic and nuclear MRTF-A (red) and GFP (green) overexpression. CMs are stained with cTNT (magenta) and nuclei with Hoechst 33258 (blue). Scale bars, 25  $\mu$ m.

**Appendix Figure S8. Generation and characterization of MYH10<sup>mut</sup> iPSCs and CMs.**

- A The table summarizes clinical features and results of genetic screening of the ARVC (MYH10<sup>mut</sup>) patient. The presence of 2 major and 2 minor diagnostic criteria according to the modified ARVC Task Force Criteria (Marcus *et al.*, 2010) fulfils the diagnosis of ARVC in the patient.

- B ARVC ( $MYH10^{mut}$ ) patient harbours a novel p.R577\* heterozygous nonsense mutation in the MYH10 protein, caused by a C>T mutation in exon 15, in position 1729 of the *MYH10* coding region, resulting in generation of premature translation termination at the amino acid position 577.
- C-F Reprogramming of  $MYH10^{mut}$  patient skin keratinocytes to iPSCs. iPSCs express the pluripotency markers NANOG (red) and TRA1-81 (green) (C) and OCT4 (green) (left panels) and SOX2 (green) (right panels) (D) as shown by immunofluorescence analysis. Nuclei are stained with Hoechst 33258 (blue). Scale bars, 50  $\mu$ m (C), 500  $\mu$ m (D). RT-PCR analysis confirms loss of Sendai viral transgenes in iPSCs. PSK indicates parental skin keratinocytes, iPSK indicates infected parental skin keratinocytes (E). Karyotyping of  $MYH10^{mut}$ -iPSCs revealed normal karyotypes (F).
- G Teratoma assay for pluripotency. Teratomas containing all three germ layers were generated from  $MYH10^{mut}$ -iPSC line. Scale bar, 200  $\mu$ m.
- H Analysis of *MYH10* transcript by qRT-PCR reveals similar expression levels in wt and  $MYH10^{mut}$  CMs. Expression values are normalized to *GAPDH*; n=3.
- I Western blotting demonstrates reduced expression of non-myosin IIB (NMIIB) protein (encoded by the *MYH10* gene) in total lysate of  $MYH10^{mut}$  CMs. Actin is shown as a loading control (lower panels). Densitometric readings for NMIIB bands reveals an almost 50% reduction in  $MYH10^{mut}$  myocytic lysates compared to wt ones. Values are expressed as the integrals (area x mean density) of each band normalized to actin and relative to wt (right panel); n=2; \*P<0.05 vs wt; t-test.
- J Immunofluorescence analysis for DSP (red) indicates an interrupted, abnormal expression at the plasma membrane of  $MYH10^{mut}$  CMs compared to wt cells. cTNT (green) marks CMs. Nuclei are stained with Hoechst 33258 (blue). Scale bars, 12.5  $\mu$ m.

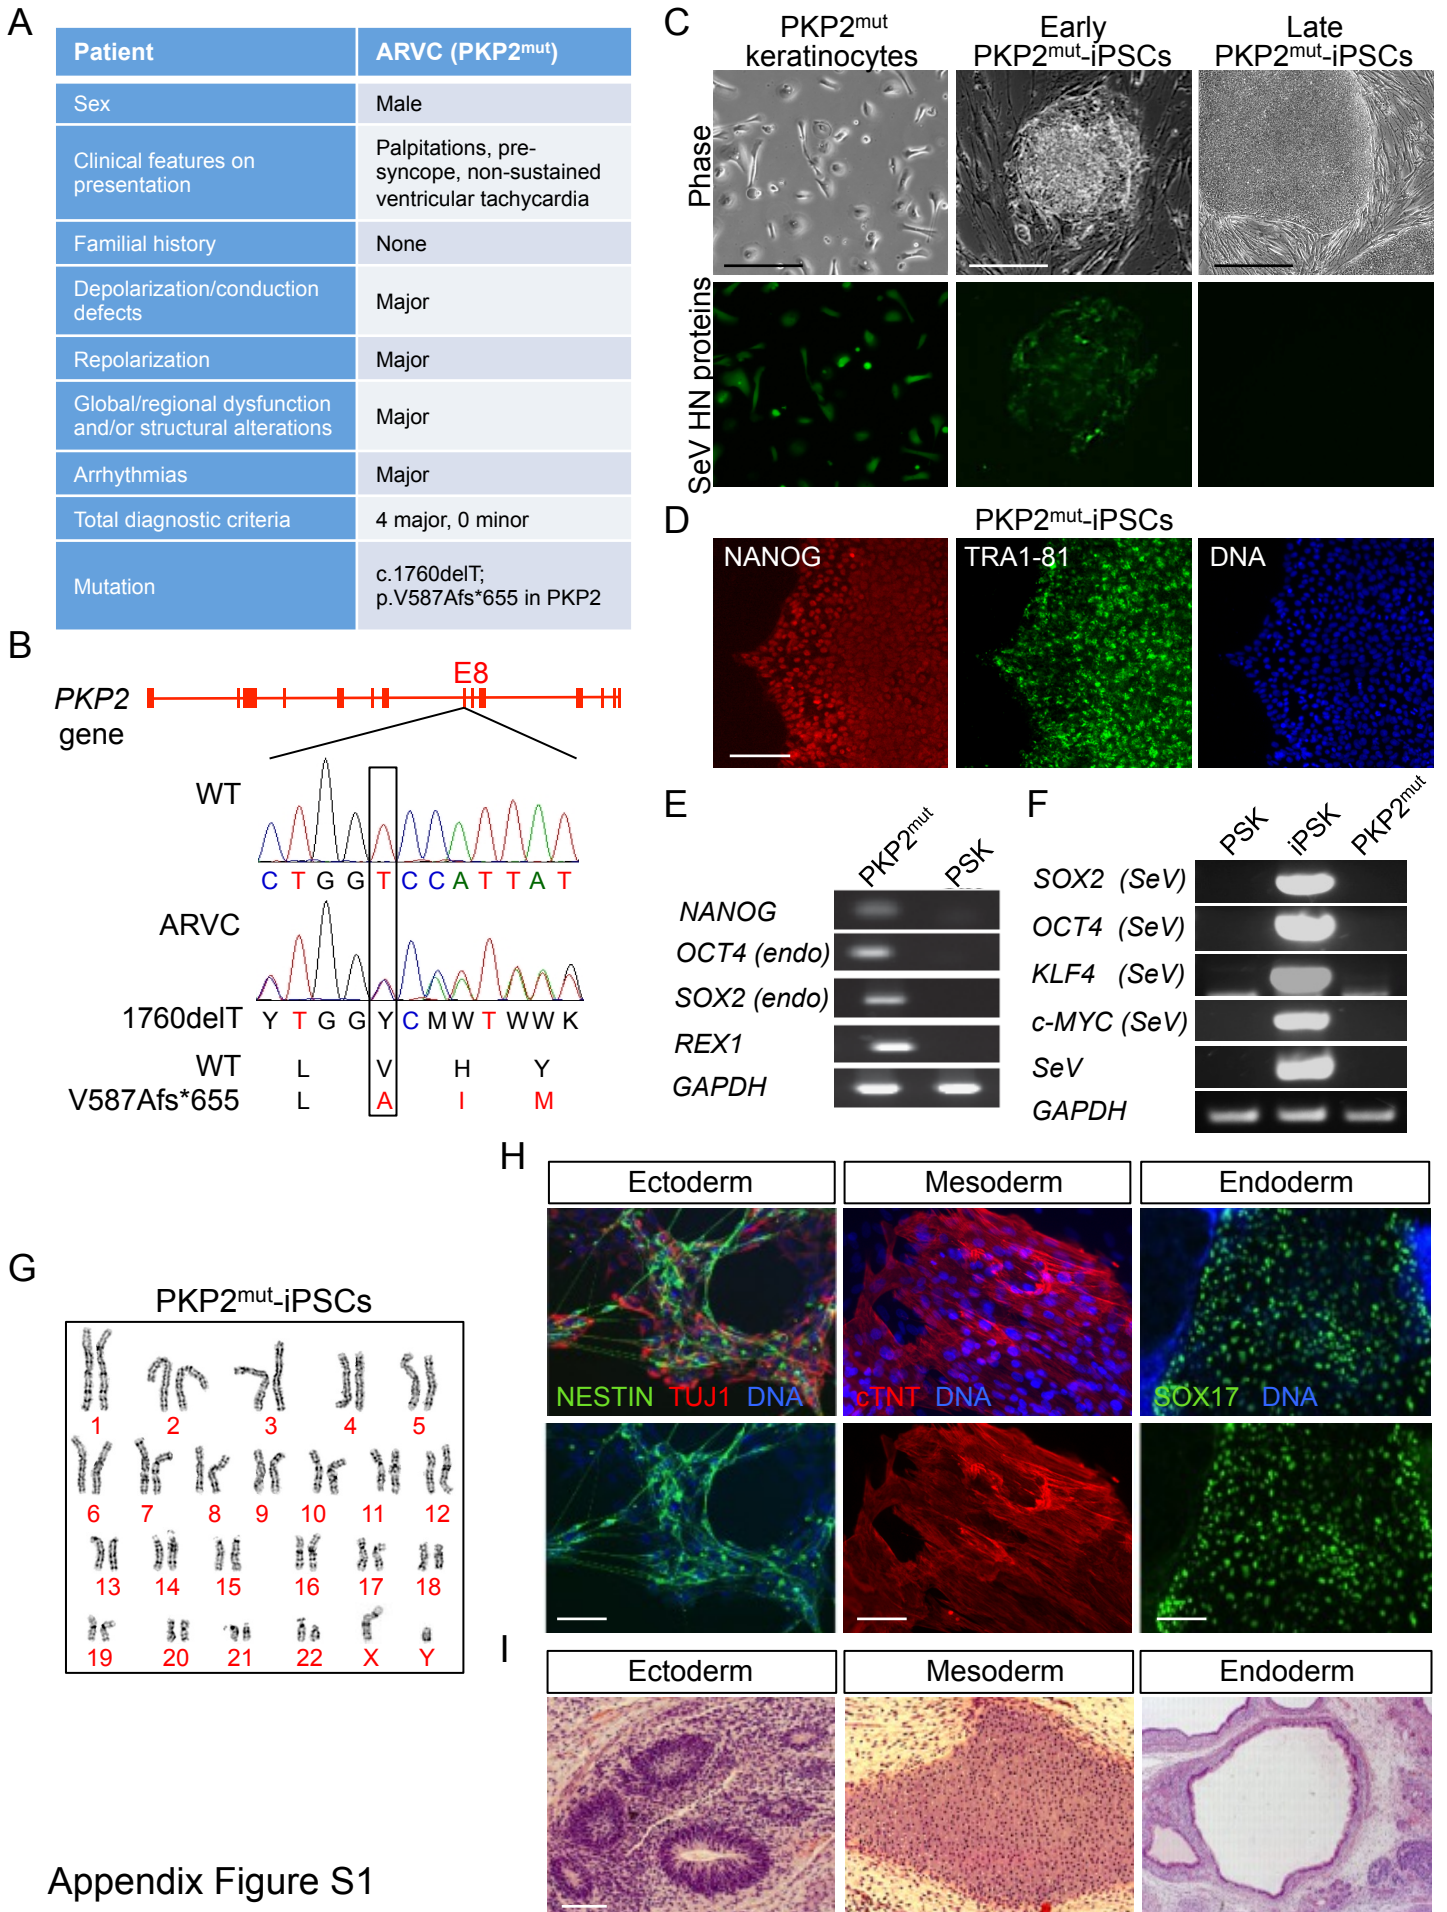

Appendix Figure S1



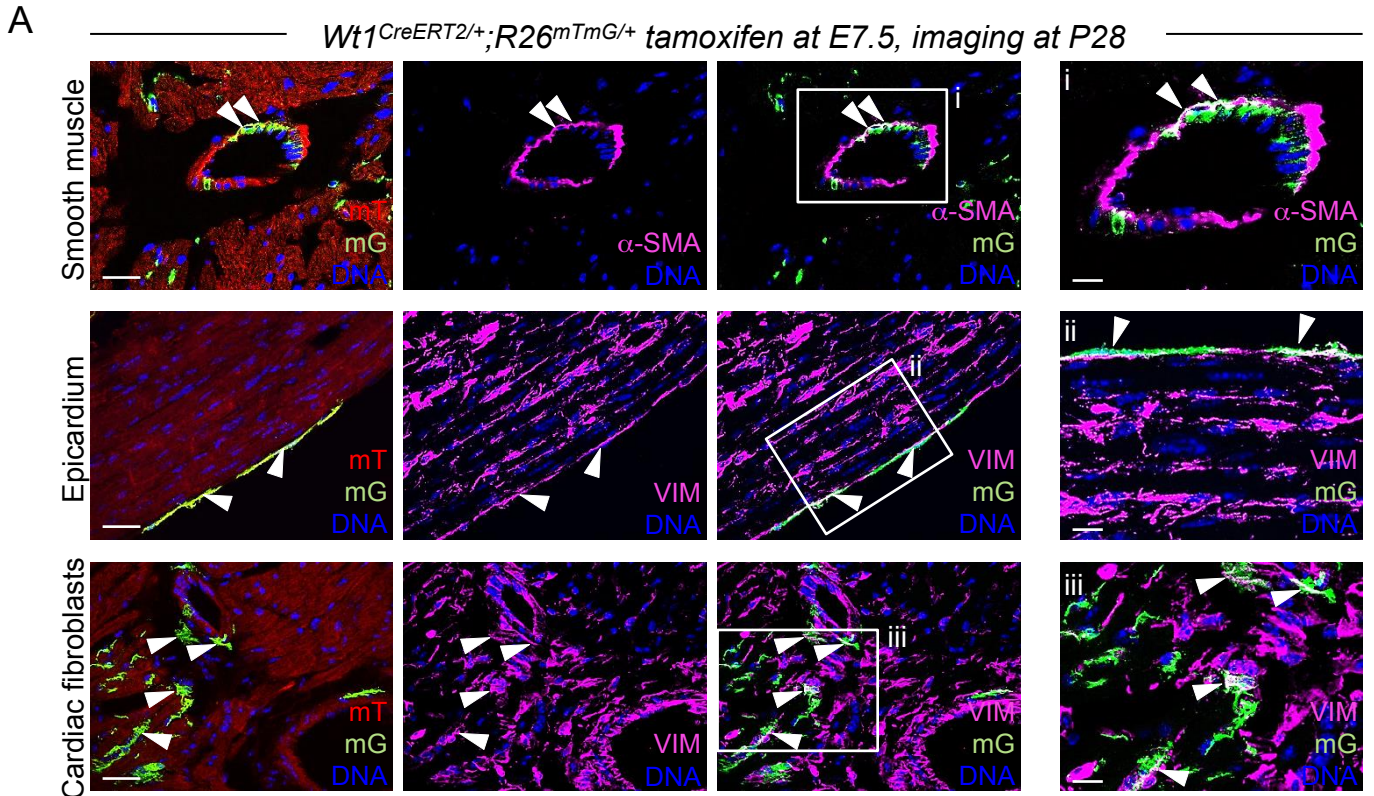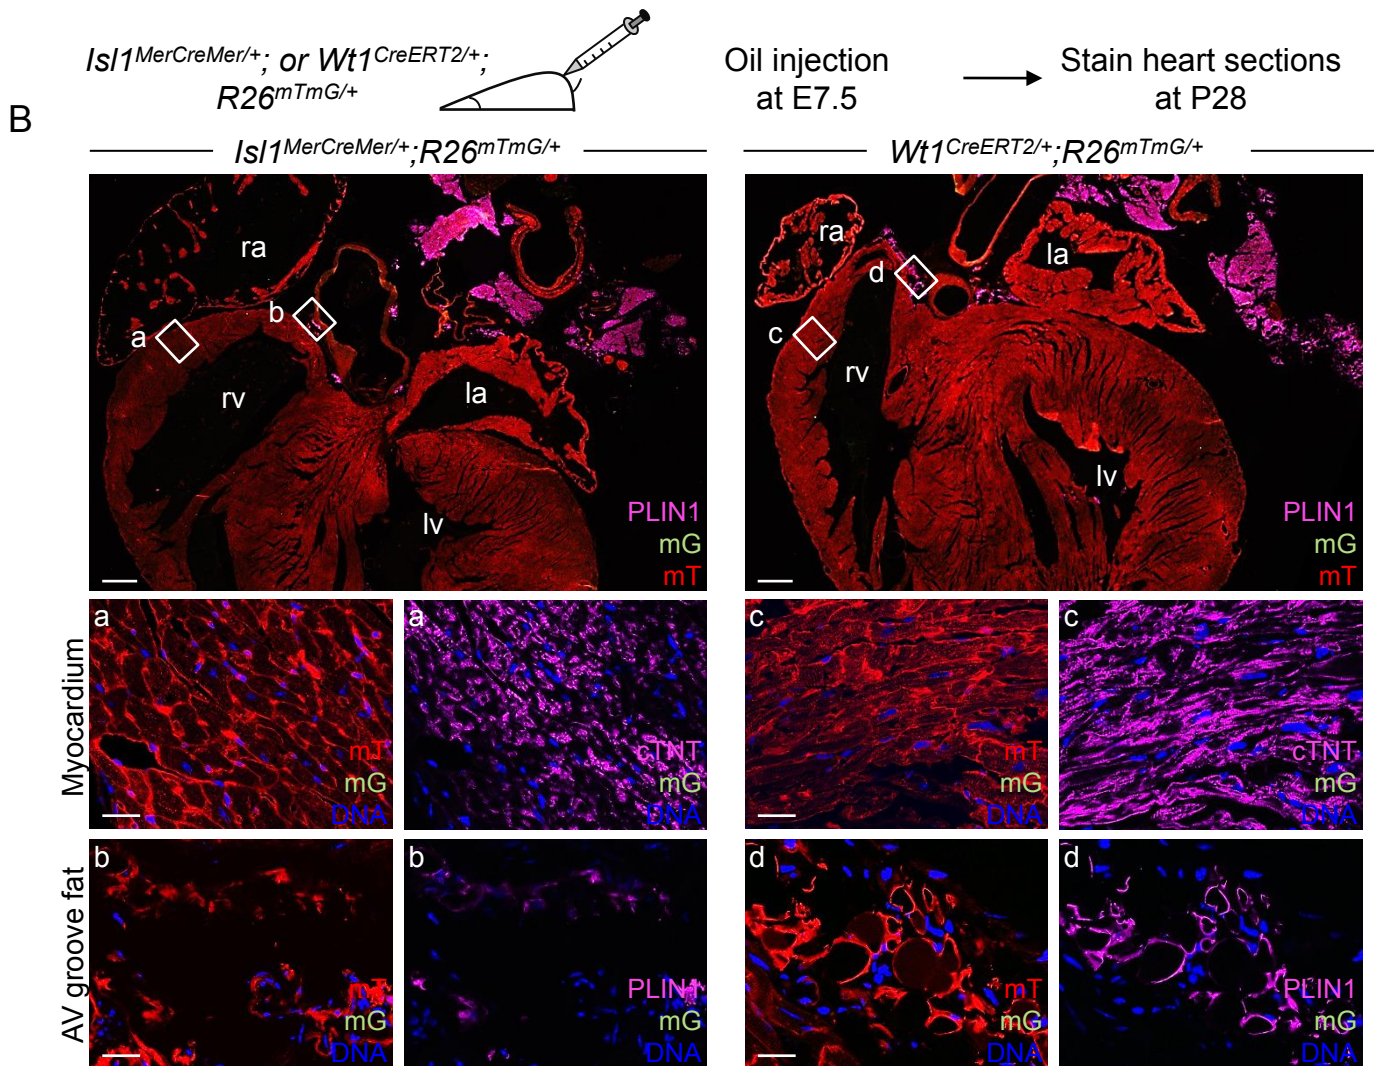

Appendix Figure S2

*Isl1*<sup>MerCreMer/+</sup> or *Wt1*<sup>CreERT2/+</sup>; *R26*<sup>mTmG/+</sup>

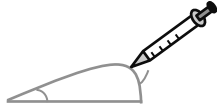

Oil injection at E7.5

Analysis at E9.5

*Isl1*<sup>MerCreMer/+</sup>; *R26*<sup>mTmG/+</sup>

*Wt1*<sup>CreERT2/+</sup>; *R26*<sup>mTmG/+</sup>

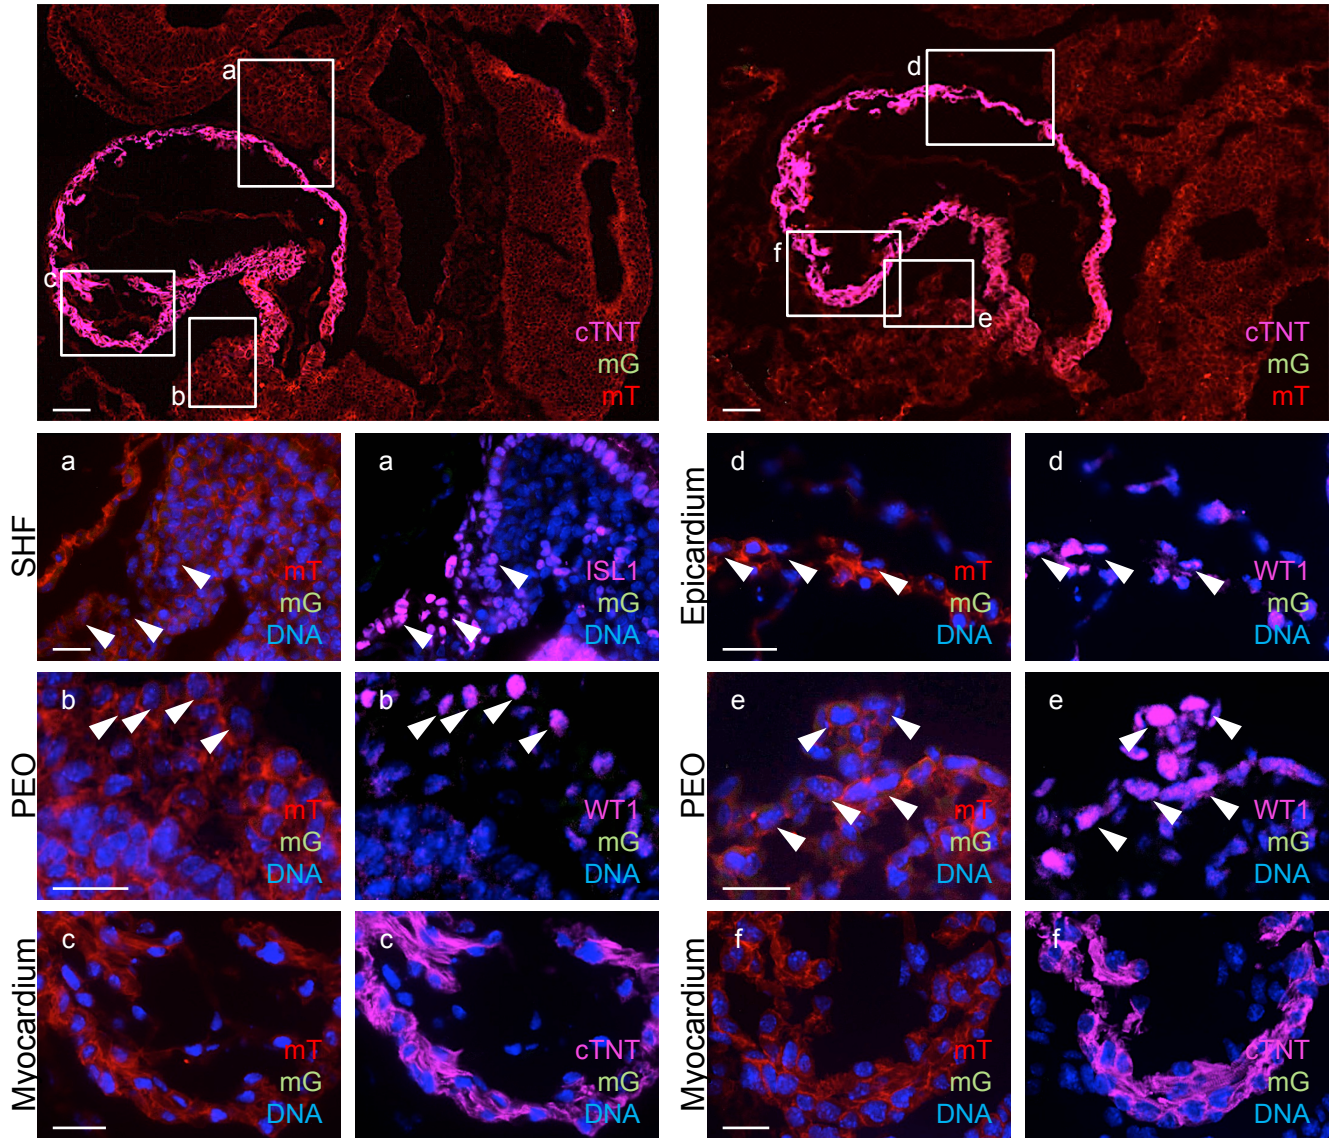

Appendix Figure S3

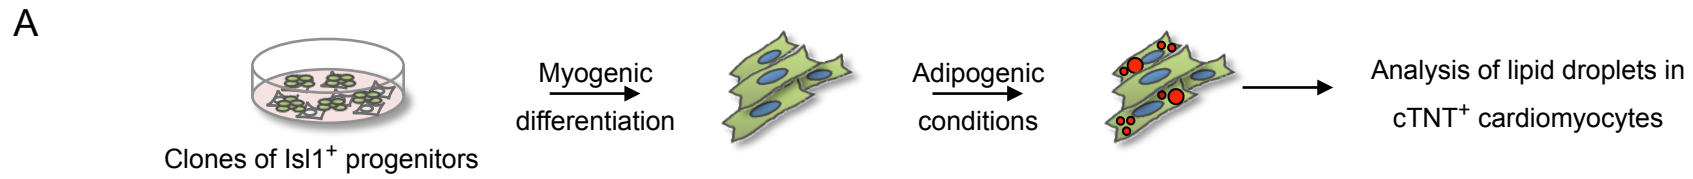

**B** Isl1<sup>+</sup>/Wt1<sup>+</sup>-derived cardiomyocytes in adipogenic conditions

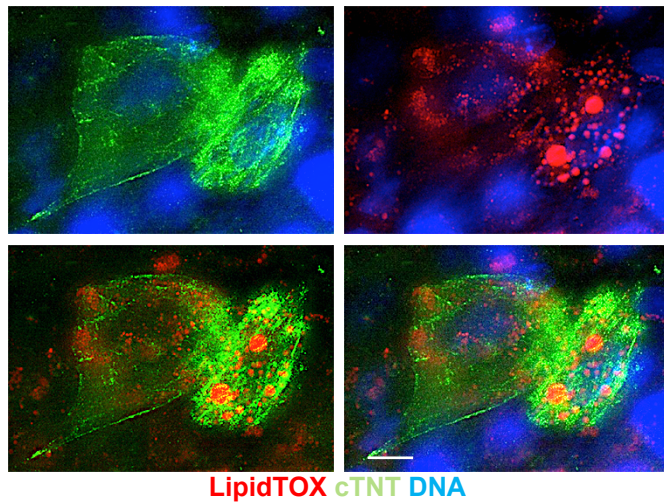

Isl1<sup>+</sup>/Wt1<sup>-</sup>-derived cardiomyocytes in adipogenic conditions

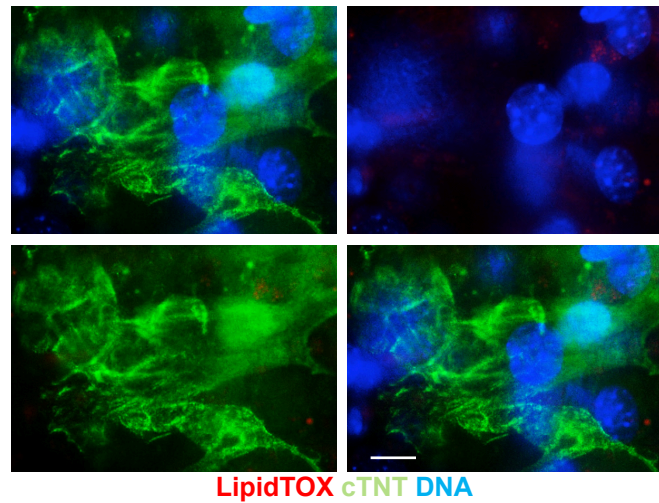

**C**

|                                     | Clone #           | % of LipidTOX <sup>+</sup> /cTNT <sup>+</sup> CMs | % of LipidTOX <sup>-</sup> /cTNT <sup>+</sup> CMs |
|-------------------------------------|-------------------|---------------------------------------------------|---------------------------------------------------|
| Isl1 <sup>+</sup> /Wt1 <sup>+</sup> | 1                 | 88                                                | 12                                                |
|                                     | 2                 | 83                                                | 17                                                |
|                                     | 3                 | 94                                                | 6                                                 |
|                                     | 4                 | 58                                                | 42                                                |
|                                     | 5                 | 79                                                | 21                                                |
|                                     | 6                 | 33                                                | 67                                                |
|                                     | 7                 | 0                                                 | 100                                               |
|                                     | <b>Mean ± SEM</b> | <b>62 ± 13</b>                                    | <b>38 ± 13</b>                                    |
| Isl1 <sup>+</sup> /Wt1 <sup>-</sup> | 1                 | 10                                                | 90                                                |
|                                     | 2                 | 0                                                 | 100                                               |
|                                     | 3                 | 0                                                 | 100                                               |
|                                     | 4                 | 5                                                 | 95                                                |
|                                     | 5                 | 0                                                 | 100                                               |
|                                     | <b>Mean ± SEM</b> | <b>3 ± 4</b>                                      | <b>97 ± 4</b>                                     |

Appendix Figure S4

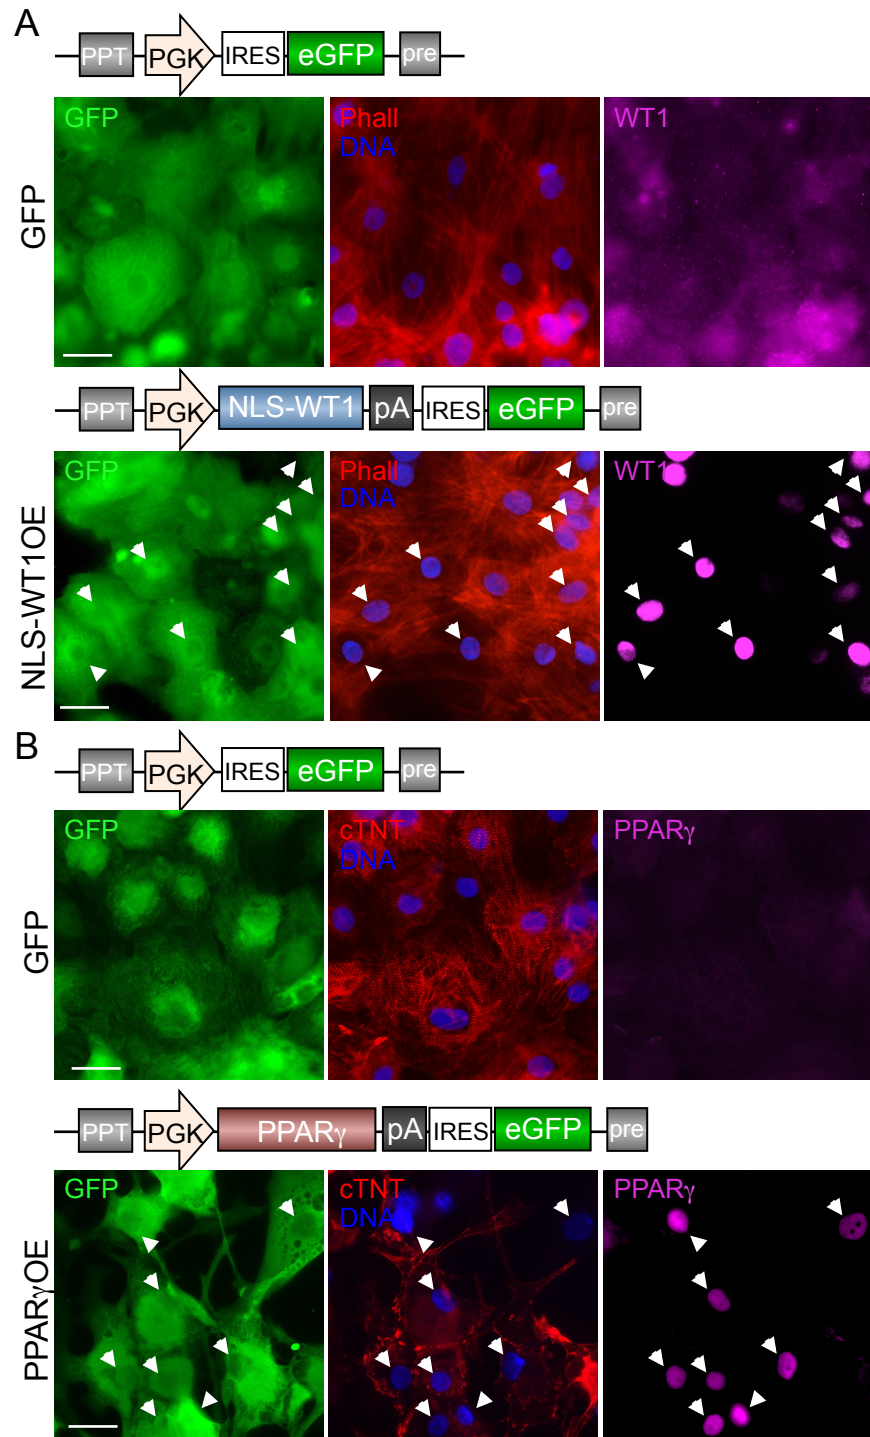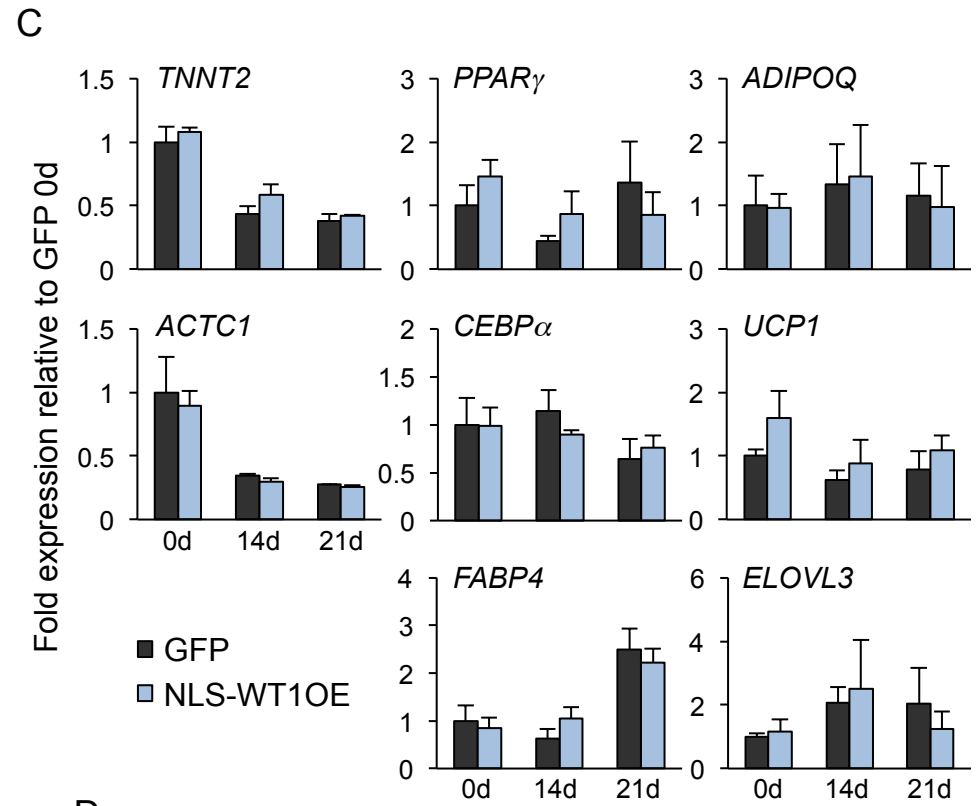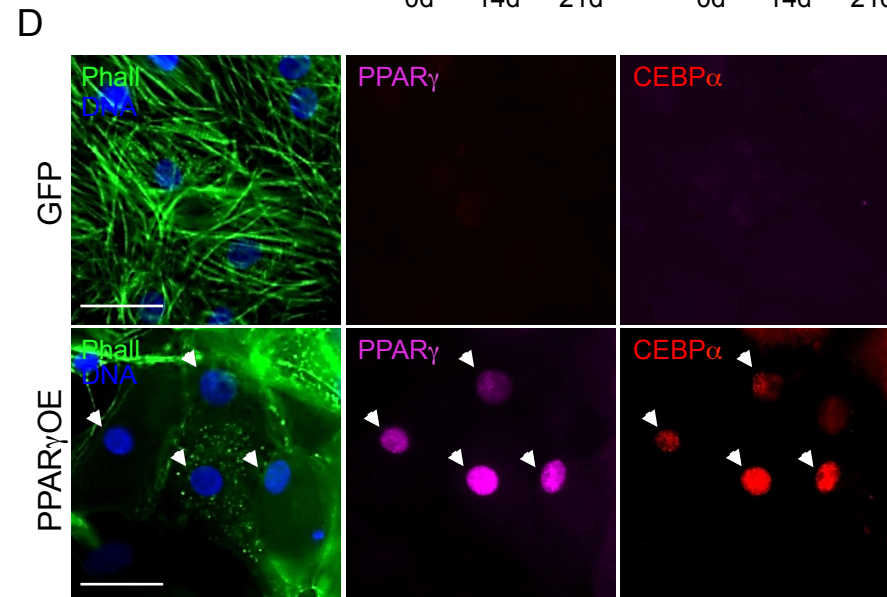

Appendix Figure S5

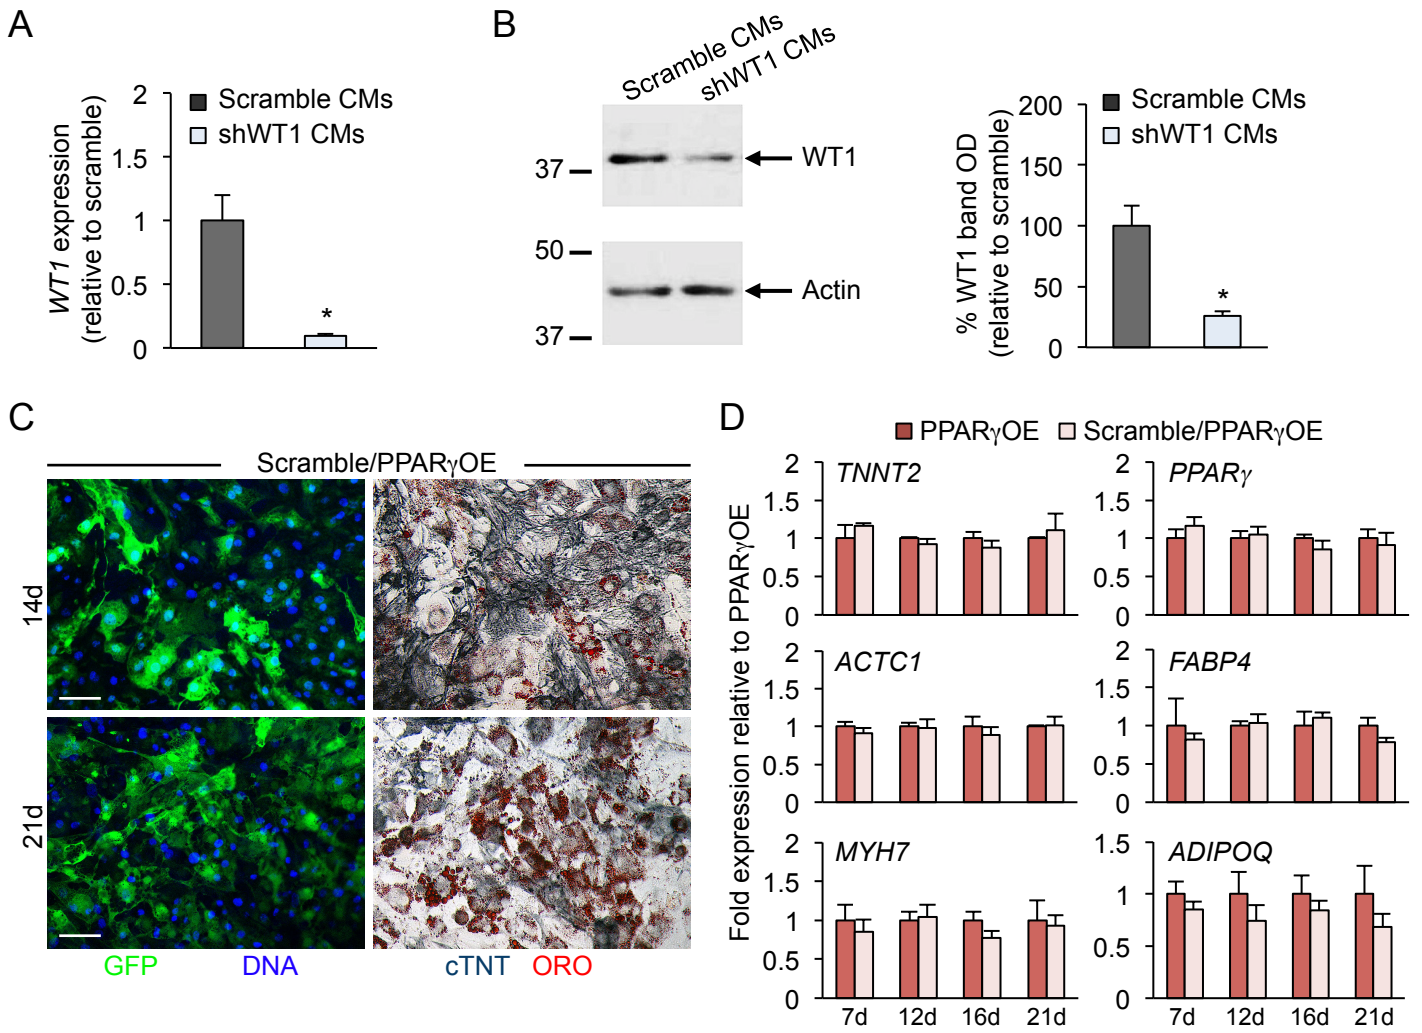

Appendix Figure S6

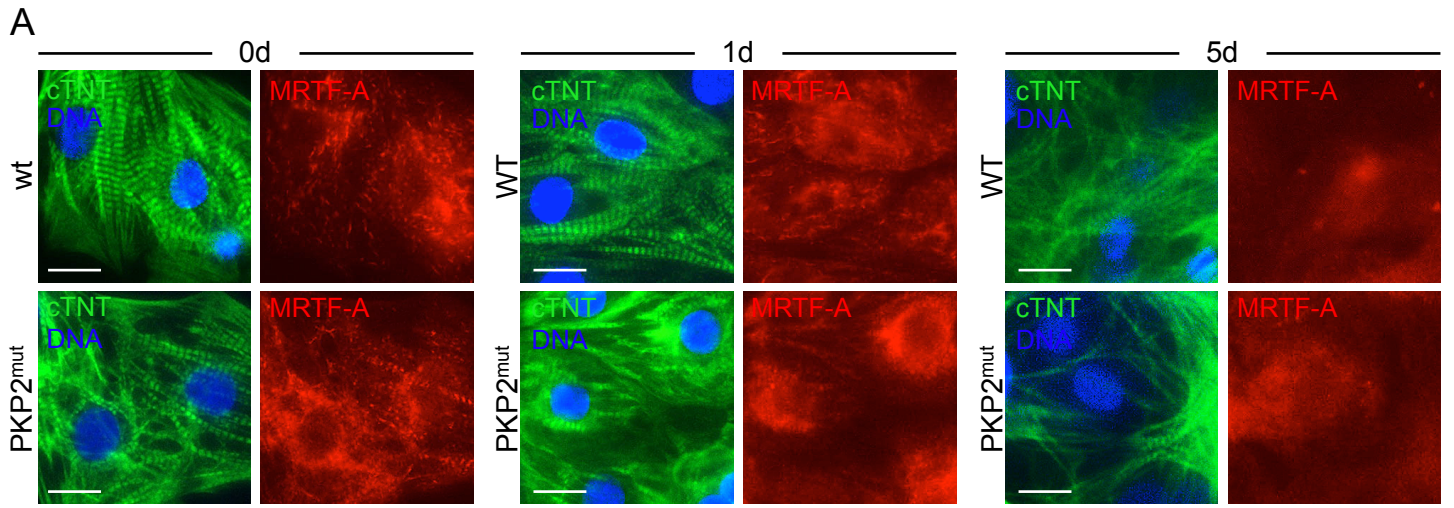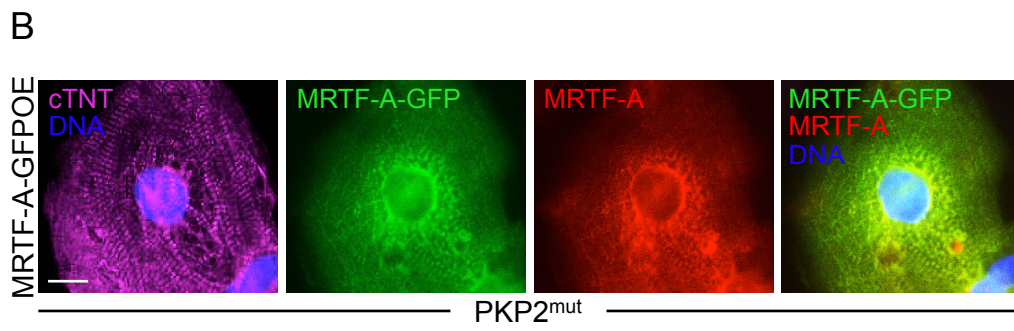

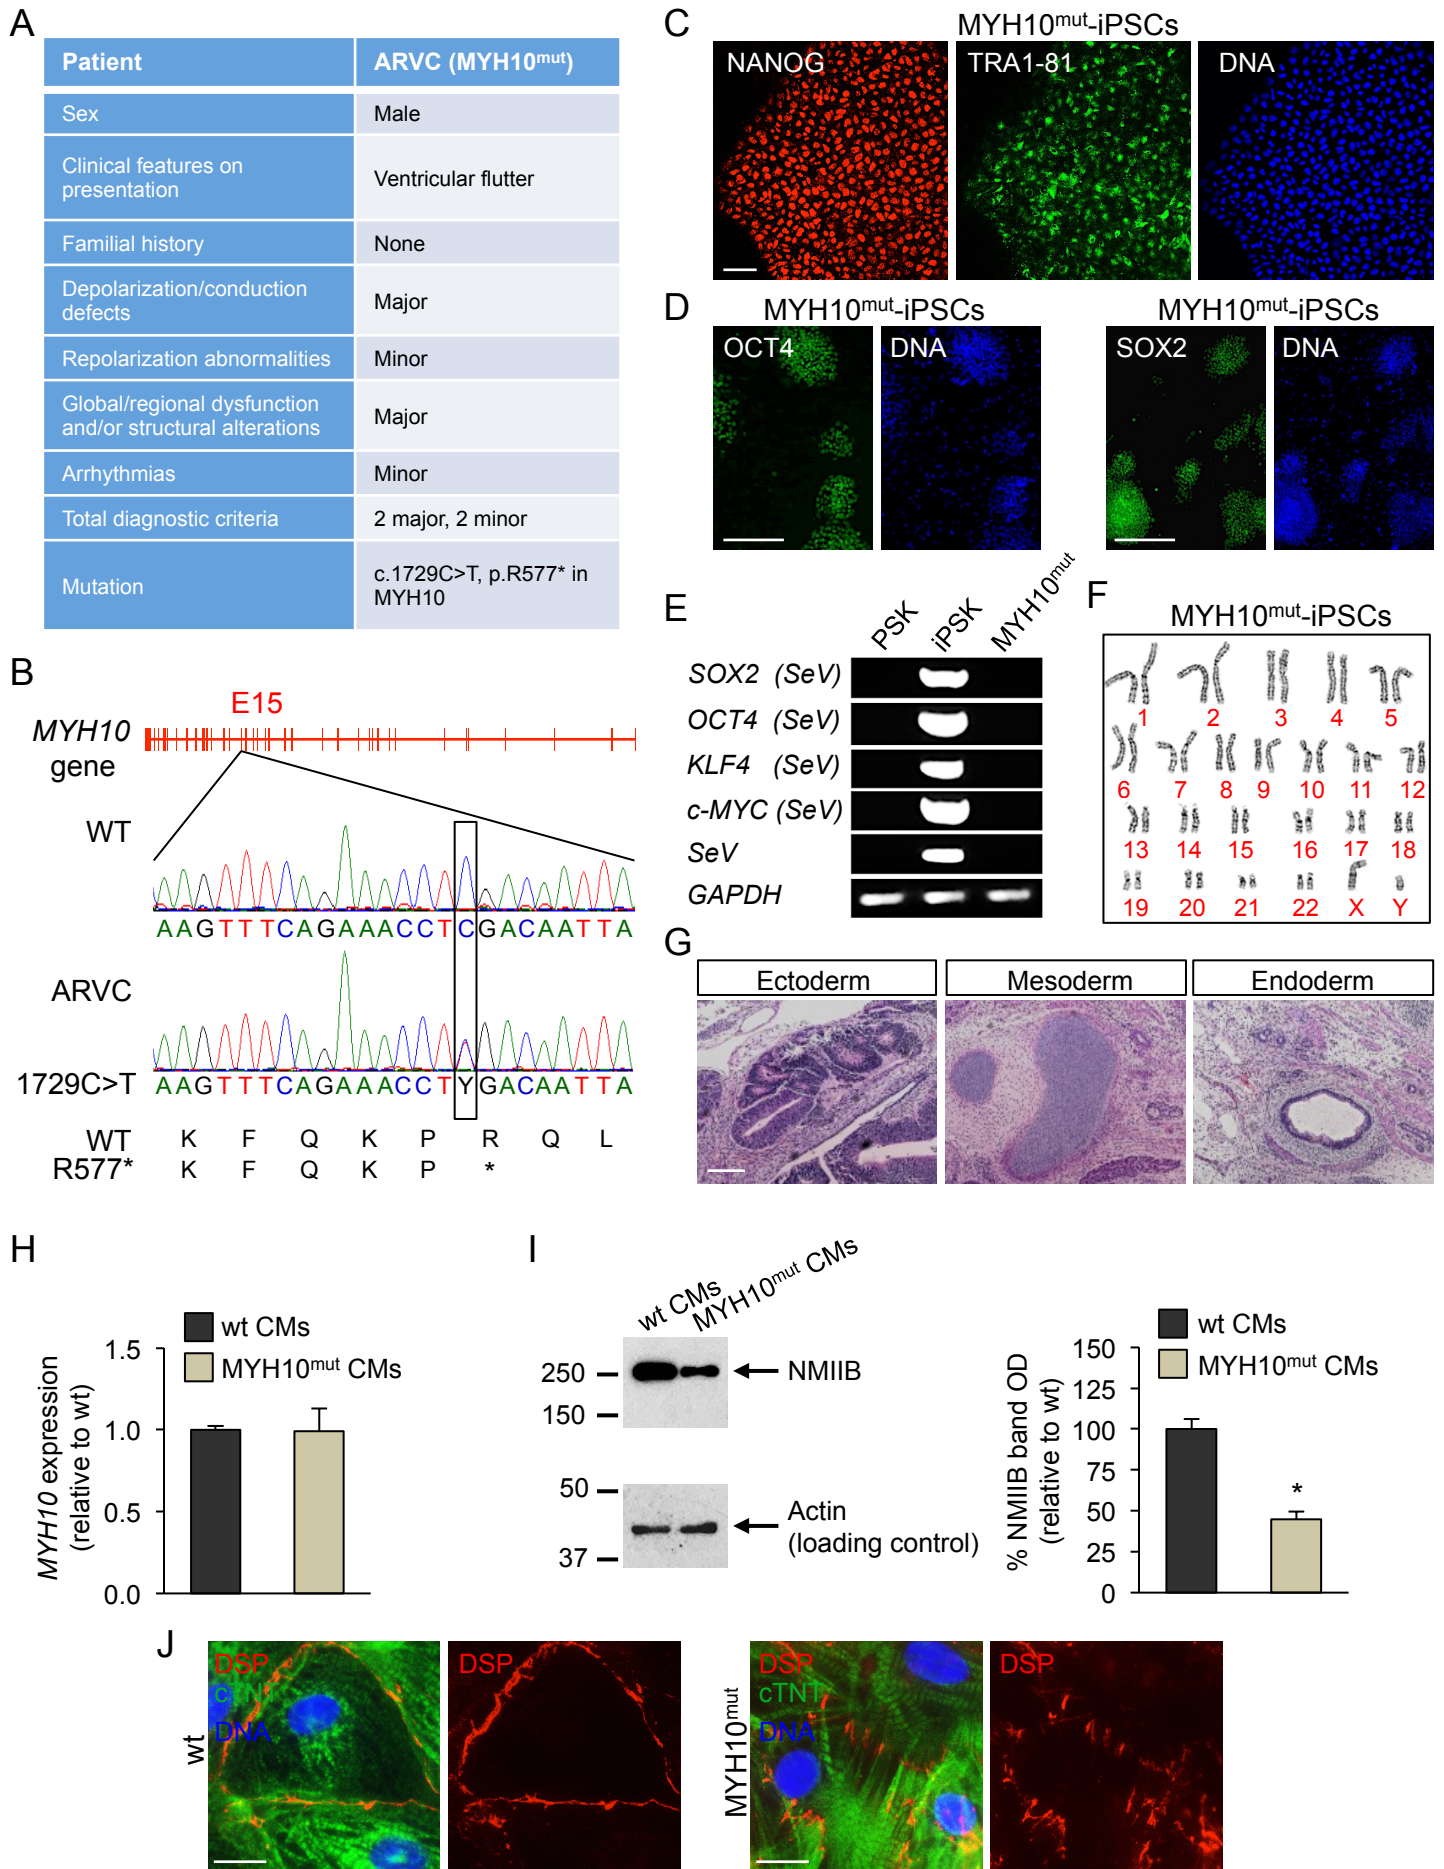

Appendix Figure S8

**Appendix Table S1.** List of ARVC-associated genes and their probabilities of loss of function intolerance (pLI).

| Gene          | Locus        | ExAC pLI | ExAC n LOF expected | ExAC n LOF observed | Reference                            |
|---------------|--------------|----------|---------------------|---------------------|--------------------------------------|
| <i>PKP2</i>   | 12p11        | 0        | 28.8                | 19                  | (Gerull <i>et al.</i> , 2004)        |
| <i>DSP</i>    | 6p24.3       | 1        | 87.7                | 14                  | (Rampazzo <i>et al.</i> , 2002)      |
| <i>DSG2</i>   | 18q12.1      | 0        | 26.1                | 10                  | (Pilichou <i>et al.</i> , 2006)      |
| <i>DSC2</i>   | 18q12.1      | 0        | 25.9                | 10                  | (Syrris <i>et al.</i> , 2006)        |
| <i>JUP</i>    | 17q21.2      | 0.04     | 19.1                | 6                   | (McKoy <i>et al.</i> , 2000)         |
| <i>CTNNA3</i> | 10q 22.2     | 0        | 68                  | 11.7                | (van Hengel <i>et al.</i> , 2013)    |
| <i>CDH2</i>   | 18q12.1      | 0.9      | 29.1                | 5                   | (Mayosi <i>et al.</i> , 2017)        |
| <i>DES</i>    | 2q35         | 0        | 16.7                | 7                   | (Klauke <i>et al.</i> , 2010)        |
| <i>TMEM43</i> | 3p25.1       | 0        | 17.2                | 13                  | (Merner <i>et al.</i> , 2008)        |
| <i>LMNA</i>   | 1q22         | 0.99     | 19.1                | 1                   | (Quarta <i>et al.</i> , 2012)        |
| <i>TGFB3</i>  | 14q24.3      | 0.92     | 12.3                | 1                   | (Beffagna <i>et al.</i> , 2005)      |
| <i>RYR2</i>   | 1q43         | 1        | 164.5               | 27                  | (Tiso <i>et al.</i> , 2001)          |
| <i>PLN</i>    | 6q22.1       | 0.11     | 1.2                 | 1                   | (van der Zwaag <i>et al.</i> , 2012) |
| <i>SCN5A</i>  | 3p21         | 1        | 55.5                | 9                   | (Erkagic <i>et al.</i> , 2008)       |
| <i>TTN</i>    | 2q32.1-q32.3 | 0        | 894                 | 247                 | (Taylor <i>et al.</i> , 2011)        |
| <i>MYH10</i>  | 17p13.1      | 1        | 79.9                | 10                  |                                      |

The table summarizes the probabilities of loss of function intolerance (pLI) calculated in the ExAC cohort considering the number of expected and observed LOF variants (canonical splice, frameshift and nonsense) for ARVC-associated genes and for the novel candidate *MYH10*. ExAC pLI score: probability of loss of function intolerance according to ExAC; ExAC n LOF expected: number of loss of function variants expected to be present in the gene in the ExAC cohort; EXAC n LOF observed: number of loss of function variants observed in the gene in the ExAC cohort.



**Appendix Table S2.** Primers and Taqman probes used for sequencing of the human *PKP2* (exon 8) and *MYH10* (exon 15) genes, RT-PCR, qRT-PCR, and ChIP-PCR as well as oligos for shRNA silencing

**Human primers**

| Gene                              | Use        | Primer forward             | Primer reverse                |
|-----------------------------------|------------|----------------------------|-------------------------------|
| <i>ADIPOQ</i>                     | qRT-PCR    | GATGAAGTCCTGTCTTGGGAAGG    | CAGCACTTAGAGATGGAGTTGG        |
| <i>ACTC1</i>                      | qRT-PCR    | GCCCTGGATTTTGAAGAATGA      | ATGCCAGCAGATTCCATACC          |
| <i>BAX</i>                        | qRT-PCR    | CAAACCTGGTGCTCAAGG         | CCAACCACCCTGGTCTTGG           |
| <i>BIM</i>                        | qRT-PCR    | CCCTTTCTTGGCCCTTGT         | CAGAAGGTTGCTTTGCCATT          |
| <i>CD137</i>                      | qRT-PCR    | AGATTTGCAGTCCCTGTCCCTC     | GAGGAACACTCCTTCTGGTC          |
| <i>C-MYC (SeV-Tg)</i>             | RT-PCR     | TAACCTGACTAGCAGGCTTGTCCG   | TCCACATACAGTCCCTGGATGATGATG   |
| <i>C/EBP<math>\alpha</math></i>   | qRT-PCR    | GAAAGCTAGGTGCTGGGTCA       | AGGCAATGCTGAAGGCATAC          |
| <i>CIDEA</i>                      | qRT-PCR    | CATGTATGAGATGTACTCCGTGTC   | GAGTAGGACAGGAACCCGAG          |
| <i>DIO2</i>                       | qRT-PCR    | CCTCCTCGATGCCTACAAAC       | GCTGGCAAAGTCAAGAAGGT          |
| <i>ELOVL3</i>                     | qRT-PCR    | ATGTAGTTCTGCCCCACAGC       | AAGGACATGAGGCCCTTTTT          |
| <i>EPSTI1</i>                     | qRT-PCR    | AGGCAAAAGTCAACCAGGTG       | TGAAGGCCAGATAGGAGTCAA         |
| <i>FABP4</i>                      | qRT-PCR    | AAAGAAGTAGGAGTGGGCTTTG     | CTGATGATCATGTTAGGTTTGG        |
| <i>FAS</i>                        | qRT-PCR    | ATGCAGAAAGCACAGAAAGGA      | CTTTCGAACAAAGCCTTTAACTTG      |
| <i>FBN1</i>                       | qRT-PCR    | TTCTGCAAGAGGATGGAAGG       | GCAGTTGTGTTGCTTGGTTG          |
| <i>GAPDH</i>                      | qRT-PCR    | TCCTCTGACTTCAACAGCGA       | GGGTCTTACTCCTTGGAGGC          |
| <i>KLF4 (SeV-Tg)</i>              | RT-PCR     | TTCCTGCATGCCAGAGGAGCCC     | AATGTATCGAAGGTGCTCAA          |
| <i>MYH7</i>                       | qRT-PCR    | TCGTGCCTGATGACAAACAGGAGT   | ATACTCGGTCTCGGCAGTGACTTT      |
| <i>MYH10</i>                      | Sequencing | GTTTGAGATGTCAGTGTTTG       | CAGAAACTTTTATACAACAGTCCC      |
| <i>MYH10</i>                      | qRT-PCR    | AAGGTCGGCCGAGACTATG        | GAACGAGCCAGCGAAAGA            |
| <i>NANOG</i>                      | RT-PCR     | TGCAAGAACTCTCCAACATCCT     | ATTGCTATTCTTCGGCCAGTT         |
| <i>NRIP1</i>                      | qRT-PCR    | GCCAGAAGATGCACACTTGAC      | AAGCTCTGAGCCTCTGCTTTC         |
| <i>OCT4 (SeV-Tg)</i>              | RT-PCR     | CCCGAAAGAGAAAGCGAACCAG     | AATGTATCGAAGGTGCTCAA          |
| <i>OCT4 endogenous</i>            | RT-PCR     | GACAGGGGGAGGGGAGGAGCTAGG   | CTTCCCTCCAACCAGTTGCCCAAAC     |
| <i>PGC1<math>\alpha</math></i>    | RT-PCR     | GACATGTGCAAGCAGGAC         | ACCAACCAGAGCAGCACA            |
| <i>PKP2</i>                       | Sequencing | AAGACTTATGACACAATTACGTG    | GTGAATAAACCTAAAACCAAGCGG      |
| <i>PKP2</i>                       | qRT-PCR    | GAGAGAAGCACTTTCCTACTGACTCC | CTCGCTCCAGAGTCATCTCC          |
| <i>PPAR<math>\gamma</math></i>    | qRT-PCR    | TGGCAATTGAATGTCGTGTC       | GGAAGAAACCCTTGCATCCT          |
| <i>PPAR<math>\gamma</math> p1</i> | ChIP-PCR   | TGGAAAACTGGAACCCTGACAC     | AAGGTAACCTCGGTGTTTTTGAGGA     |
| <i>PPAR<math>\gamma</math> p2</i> | ChIP-PCR   | ACAGTGCTGAGGGCAAGAAT       | CCTGGTACCCTGCTTTCTG           |
| <i>PRDM16</i>                     | qRT-PCR    | AGGGCAAGGAGCGATACAC        | TGTCTGGTGAGATTGGCTGA          |
| <i>REX1</i>                       | RT-PCR     | ACCAGCACACTAGGCAAACC       | TTCTGTTACACAGGCTCCA           |
| <i>SEV-TG</i>                     | RT-PCR     | GGATCACTAGGTGATATCGAGC     | ACCAGACAAGAGTTTAAGAGATATGTATC |
| <i>SOX2 (SeV-Tg)</i>              | qRT-PCR    | ATGCACCGCTACGACGTGAGCGC    | AATGTATCGAAGGTGCTCAA          |
| <i>SOX2 endogenous</i>            | RT-PCR     | GGGAAATGGGAGGGGTGCAAAGAGG  | TTGCGTGAGTGTGGATGGGATTGGTG    |
| <i>TCF21</i>                      | qRT-PCR    | CCCGAGAGTGACCTGAAAGA       | GCTCCAGGTACCAAACCTCCA         |
| <i>TMEM26</i>                     | qRT-PCR    | ATGGAGGGACTGGTCTTCTT       | CTTCACCTCGGTCACTCGC           |
| <i>TNNT2</i>                      | qRT-PCR    | AGCATCTATAACTTGGAGGCAGAG   | TGGAGACTTTCTGTTATCGTTG        |
| <i>UCP1</i>                       | qRT-PCR    | AGGTCCAAGGTGAATGCC         | GCGGTGATTGTTCCAGGA            |
| <i>WT1</i>                        | qRT-PCR    | TACACACGCACGGTGTCTTC       | GGGCGTTTCTCACTGGTCT           |

**Mouse primers**

| Gene         | Use    | Primer forward         | Primer reverse           |
|--------------|--------|------------------------|--------------------------|
| <i>GAPDH</i> | RT-PCR | GCAGTGGCAAAGTGGAGATTG  | AGAGATGATGACCCTTTTGGCTCC |
| <i>Isl1</i>  | RT-PCR | GCTATTCACCAATTGTCCAACC | AACCAACACACAGGGAAATCA    |

|               |        |                      |                     |
|---------------|--------|----------------------|---------------------|
| <i>Nkx2-5</i> | RT-PCR | CAAGTGCTCTCCTGCTTTCC | GTCCAGCTCCACTGCCTTC |
| <i>Wt1</i>    | RT-PCR | AGTTCCCAACCATTCTTC   | TTCAAGCTGGGAGGTCATT |

### Mouse Taqman probes

| Gene          | Use     | Probe                                      |
|---------------|---------|--------------------------------------------|
| <i>Gapdh</i>  | qRT-PCR | Mm999 999 15_g1 (Thermo Fisher Scientific) |
| <i>Gata4</i>  | qRT-PCR | Mm004 846 89_m1 (Thermo Fisher Scientific) |
| <i>Isl1</i>   | qRT-PCR | Mm006 278 60_m1 (Thermo Fisher Scientific) |
| <i>Nkx2-5</i> | qRT-PCR | Mm006 577 83_m1 (Thermo Fisher Scientific) |

### Oligos for shWT1

|                 |         |                     |
|-----------------|---------|---------------------|
| <i>shWT1</i>    | cloning | GAATTAGTCCGCCATCACA |
| <i>scramble</i> | cloning | GCGCAGGATCGGACTAGAT |

**Appendix Table S3.** Antibodies used in this study

| Name of the antibody                                 | Species    | Clone       | Cat. Nr.    | Company                   | Dilution                | Application |
|------------------------------------------------------|------------|-------------|-------------|---------------------------|-------------------------|-------------|
| Anti-Nanog                                           | rabbit     |             | ab21624     | Abcam                     | 1/500                   | IF          |
| Anti-TRA1-81-Alexa-Fluor-488                         | mouse      |             | 560174      | BD                        | 1/20                    | IF          |
| Anti-SOX17                                           | goat       |             | AF1924      | R&D                       | 1/1000                  | IF          |
| Anti-SOX2                                            | goat       |             | AF2018      | R&D                       | 1/1000                  | IF          |
| Anti-C/EBP $\alpha$                                  | mouse      | G-10        | sc-166258   | Santa Cruz                | 1/100                   | IF          |
| Anti-PPAR $\gamma$                                   | mouse      | E-8         | sc-7273     | Santa Cruz                | 1/100                   | IF          |
| Anti-PPAR $\gamma$                                   | rabbit     | 81B8        | #2443       | Cell Signaling Technology | 1/100                   | IF          |
| Anti-plakophilin-2 (PKP2)                            | guinea pig |             | AP09554SU-N | Acris                     | 1/200                   | IF          |
| Anti-plakophilin-2 (PKP2)                            | mouse      |             | 610788      | BD                        | 1/1000                  | WB          |
| anti-desmoplakin 1/2                                 | mouse      |             | 65146       | Progen                    | 1/200                   | IF          |
| Anti-cardiac troponin T (cTNT)                       | mouse      | clone 13-11 | MS-295-P1   | Thermo Fischer Scientific | 1/500                   | IF          |
| Anti-cardiac troponin T (cTNT)                       | rabbit     | EPR3696     | ab92546     | Abcam                     | 1/500                   | IF          |
| Anti-MRTFA                                           | goat       | C-19        | sc-21558    | Santa Cruz                | 1/100                   | IF          |
| Anti-Wt1                                             | rabbit     |             | CA1026      | Millipore                 | 1/100, 2 $\mu$ g, 1:500 | IF, IP, WB  |
| Anti-pan-cadherin                                    | rabbit     |             | #4068       | Cell Signaling Technology | 1/1000                  | WB          |
| Anti-actin                                           | mouse      | ACTN05 (C4) | ab3280      | Abcam                     | 1/1000                  | WB          |
| Anti-RhoA                                            | mouse      | 7F1.E5      | ARH94       | Cytoskeleton              | 1/100                   | IF          |
| Anti-GFP                                             | chicken    |             | GFP-1020    | Aves                      | 1/500                   | IF          |
| Anti-GFP                                             | rabbit     |             | SP3005P     | Acris                     | 1/300                   | IF          |
| Anti-RFP                                             | rat        | 5F8         | 5f8         | Chromo Tek                | 1/1000                  | IF          |
| Anti-alpha skeletal muscle actin                     | mouse      |             | ab28052     | Abcam                     | 1/100                   | IF          |
| Anti- $\alpha$ -smooth muscle actin ( $\alpha$ -sma) | mouse      | 1A4         | A2547       | Sigma Aldrich             | 1/400                   | IF          |
| Anti-Isl1                                            | mouse      | 39.4D5      | 39.4D5      | DSHB                      | 1/100                   | IF          |
| Anti-perilipin 1(Plin1)                              | rabbit     |             | P1998       | Sigma Aldrich             | 1/500                   | IF          |
| Anti-non-muscle myosin IIB (MYH10)                   | mouse      | 3H2         | ab684       | Abcam                     | 1/100, 1/2000           | IF, WB      |
| Anti-Vimentin                                        | chicken    |             | ab24525     | Abcam                     | 1/500                   | IF          |
| Anti-HA-tag                                          | rabbit     |             | ab9110      | Abcam                     | 2 $\mu$ g               | IP          |

|                                   |        |       |             |                        |         |    |
|-----------------------------------|--------|-------|-------------|------------------------|---------|----|
| Anti-mouse IgG (HRP)              | donkey |       | 715-035-151 | Jackson ImmunoResearch | 1:10000 | WB |
| Anti-rabbit IgG (HRP)             | goat   |       | 111-035-144 | Jackson ImmunoResearch | 1:10000 | WB |
| Anti-mouse IgG light chain (HRP)  | rabbit | D3V2A | 58802       | Cell Signaling         | 1:1000  | WB |
| Anti-rabbit IgG heavy chain (HRP) | mouse  | 2A9   | ab99702     | Abcam                  | 1:1000  | WB |
| Rabbit IgG                        | rabbit |       | ab27478     | Abcam                  | 2 µg    | IP |

## APPENDIX REFERENCES

- Beffagna G, Occhi G, Nava A, Vitiello L, Ditadi A, Basso C, Bauce B, Carraro G, Thiene G, Towbin JA, Danieli GA, Rampazzo A (2005) Regulatory mutations in transforming growth factor-beta3 gene cause arrhythmogenic right ventricular cardiomyopathy type 1. *Cardiovasc Res* 65: 366-73
- Erkapic D, Neumann T, Schmitt J, Sperzel J, Berkowitsch A, Kuniss M, Hamm CW, Pitschner HF (2008) Electrical storm in a patient with arrhythmogenic right ventricular cardiomyopathy and SCN5A mutation. *Europace* 10: 884-7
- Gerull B, Heuser A, Wichter T, Paul M, Basson CT, McDermott DA, Lerman BB, Markowitz SM, Ellinor PT, MacRae CA, Peters S, Grossmann KS, Drenckhahn J, Michely B, Sasse-Klaassen S, Birchmeier W, Dietz R, Breithardt G, Schulze-Bahr E, Thierfelder L (2004) Mutations in the desmosomal protein plakophilin-2 are common in arrhythmogenic right ventricular cardiomyopathy. *Nat Genet* 36: 1162-4
- Klauke B, Kossmann S, Gaertner A, Brand K, Stork I, Brodehl A, Dieding M, Walhorn V, Anselmetti D, Gerdes D, Bohms B, Schulz U, Zu Knyphausen E, Vorgerd M, Gummert J, Milting H (2010) De novo desmin-mutation N116S is associated with arrhythmogenic right ventricular cardiomyopathy. *Hum Mol Genet* 19: 4595-607
- Marcus FI, McKenna WJ, Sherrill D, Basso C, Bauce B, Bluemke DA, Calkins H, Corrado D, Cox MG, Daubert JP, Fontaine G, Gear K, Hauer R, Nava A, Picard MH, Protonotarios N, Saffitz JE, Sanborn DM, Steinberg JS, Tandri H et al. (2010) Diagnosis of arrhythmogenic right ventricular cardiomyopathy/dysplasia: proposed modification of the task force criteria. *Circulation* 121: 1533-41
- Mayosi BM, Fish M, Shaboodien G, Mastantuono E, Kraus S, Wieland T, Kotta MC, Chin A, Laing N, Ntusi NB, Chong M, Horsfall C, Pimstone SN, Gentilini D, Parati G, Strom TM, Meitinger T, Pare G, Schwartz PJ, Crotti L (2017) Identification of Cadherin 2 (CDH2) Mutations in Arrhythmogenic Right Ventricular Cardiomyopathy. *Circ Cardiovasc Genet* 10
- McKoy G, Protonotarios N, Crosby A, Tsatsopoulou A, Anastasakis A, Coonar A, Norman M, Baboonian C, Jeffery S, McKenna WJ (2000) Identification of a deletion in plakoglobin in arrhythmogenic right ventricular cardiomyopathy with palmoplantar keratoderma and woolly hair (Naxos disease). *Lancet* 355: 2119-24

- Merner ND, Hodgkinson KA, Haywood AF, Connors S, French VM, Drenckhahn JD, Kupprion C, Ramadanova K, Thierfelder L, McKenna W, Gallagher B, Morris-Larkin L, Bassett AS, Parfrey PS, Young TL (2008) Arrhythmogenic right ventricular cardiomyopathy type 5 is a fully penetrant, lethal arrhythmic disorder caused by a missense mutation in the TMEM43 gene. *Am J Hum Genet* 82: 809-21
- Pilichou K, Nava A, Basso C, Beffagna G, Bauce B, Lorenzon A, Frigo G, Vettori A, Valente M, Towbin J, Thiene G, Danieli GA, Rampazzo A (2006) Mutations in desmoglein-2 gene are associated with arrhythmogenic right ventricular cardiomyopathy. *Circulation* 113: 1171-9
- Quarta G, Syrris P, Ashworth M, Jenkins S, Zuborne Alapi K, Morgan J, Muir A, Pantazis A, McKenna WJ, Elliott PM (2012) Mutations in the Lamin A/C gene mimic arrhythmogenic right ventricular cardiomyopathy. *Eur Heart J* 33: 1128-36
- Rampazzo A, Nava A, Malacrida S, Beffagna G, Bauce B, Rossi V, Zimbello R, Simionati B, Basso C, Thiene G, Towbin JA, Danieli GA (2002) Mutation in human desmoplakin domain binding to plakoglobin causes a dominant form of arrhythmogenic right ventricular cardiomyopathy. *Am J Hum Genet* 71: 1200-6
- Syrris P, Ward D, Evans A, Asimaki A, Gandjbakhch E, Sen-Chowdhry S, McKenna WJ (2006) Arrhythmogenic right ventricular dysplasia/cardiomyopathy associated with mutations in the desmosomal gene desmocollin-2. *Am J Hum Genet* 79: 978-84
- Taylor M, Graw S, Sinagra G, Barnes C, Slavov D, Brun F, Pinamonti B, Salcedo EE, Sauer W, Pyxaras S, Anderson B, Simon B, Bogomolovas J, Labeit S, Granzier H, Mestroni L (2011) Genetic variation in titin in arrhythmogenic right ventricular cardiomyopathy-overlap syndromes. *Circulation* 124: 876-85
- Tiso N, Stephan DA, Nava A, Bagattin A, Devaney JM, Stanchi F, Larderet G, Brahmbhatt B, Brown K, Bauce B, Muriago M, Basso C, Thiene G, Danieli GA, Rampazzo A (2001) Identification of mutations in the cardiac ryanodine receptor gene in families affected with arrhythmogenic right ventricular cardiomyopathy type 2 (ARVD2). *Hum Mol Genet* 10: 189-94
- van der Zwaag PA, van Rijsingen IA, Asimaki A, Jongbloed JD, van Veldhuisen DJ, Wiesfeld AC, Cox MG, van Lochem LT, de Boer RA, Hofstra RM, Christiaans I, van Spaendonck-Zwarts KY, Lekanne dit Deprez RH, Judge DP, Calkins H, Suurmeijer AJ, Hauer RN, Saffitz JE, Wilde AA, van den Berg MP et al. (2012) Phospholamban R14del mutation in patients diagnosed with dilated cardiomyopathy or arrhythmogenic

right ventricular cardiomyopathy: evidence supporting the concept of arrhythmogenic cardiomyopathy. *Eur J Heart Fail* 14: 1199-207

van Hengel J, Calore M, Bauce B, Dazzo E, Mazzotti E, De Bortoli M, Lorenzon A, Li Mura IE, Beffagna G, Rigato I, Vleeschouwers M, Tyberghein K, Hulpiau P, van Hamme E, Zaglia T, Corrado D, Basso C, Thiene G, Daliento L, Nava A et al. (2013) Mutations in the area composita protein alphaT-catenin are associated with arrhythmogenic right ventricular cardiomyopathy. *Eur Heart J* 34: 201-10
