# Supplementary material for: Interplay of cell–cell contacts and RhoA/MRTF‐A signaling regulates cardiomyocyte identity
Source: PubMed Central journal article supplement (PMC6003642; doi:10.15252/embj.201798133), 2018-05-15
Supplement: EMBJ-37-e98133-s002.pdf [file EMBJ-37-e98133-s002.pdf]

## Expanded View Figures

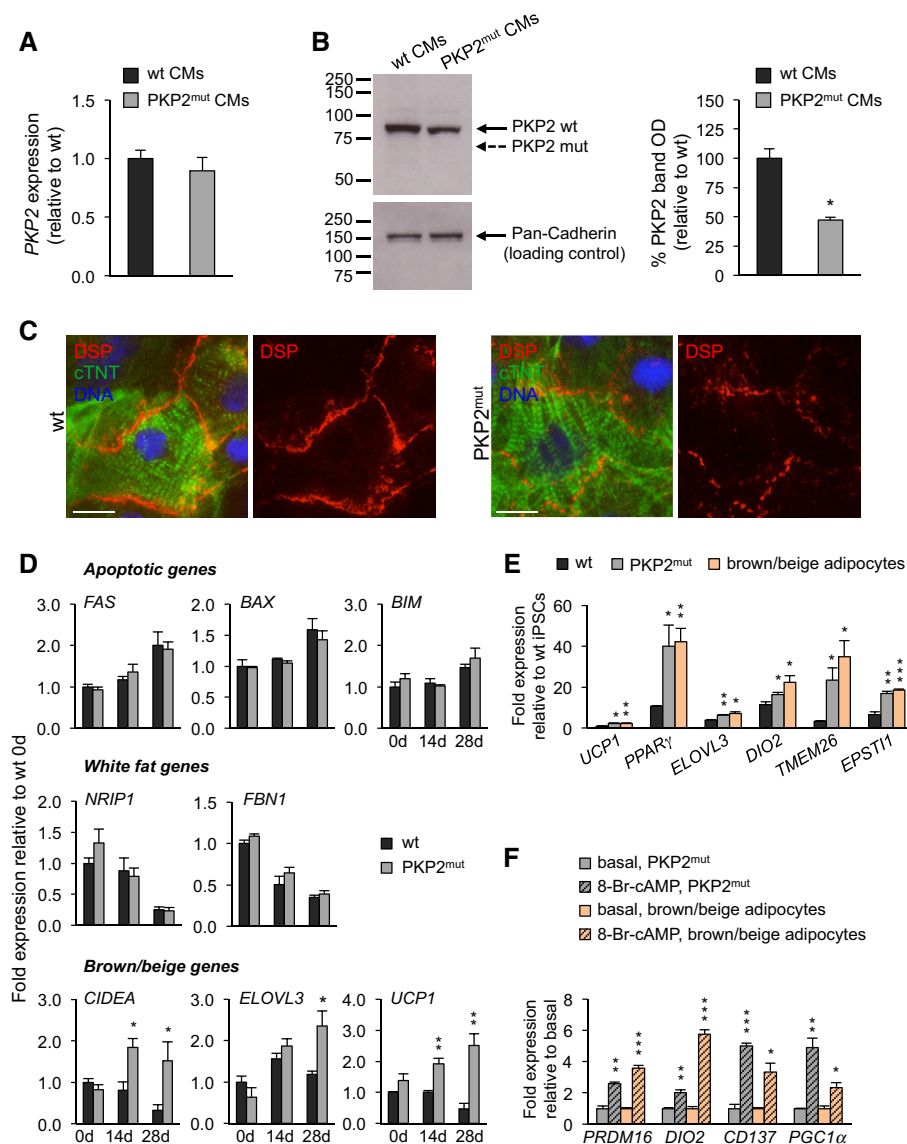

**Figure EV1. Expression of desmosomal, pro-apoptotic, and adipocytic genes in PKP2<sup>mut</sup> CMs.**

**A** qRT-PCR analysis of *PKP2* reveals similar expression levels in wt and PKP2<sup>mut</sup> CMs ( $n = 3$ ).

**B** Left, Western blotting using an antibody directed against the N-terminus of PKP2 demonstrates reduced expression of wild-type PKP2 protein (PKP2 wt, 97 kDa) and absence of truncated A587fsX655-PKP2 product (PKP2 mut, 72 kDa) in total lysates of PKP2<sup>mut</sup> CMs. Pan-Cadherin is shown as a loading control. Right, densitometric readings for PKP2-wt bands reveal an almost 50% reduction in PKP2<sup>mut</sup> myocyte lysates compared to wt ones. Values are expressed as the integrals (area  $\times$  mean density) of each band normalized to Pan-Cadherin and relative to wt;  $n = 3$ ; \* $P < 0.01$  vs. wt;  $t$ -test.

**C** Immunofluorescence analysis indicates an interrupted desmoplakin expression (DSP, red) at the plasma membrane of PKP2<sup>mut</sup> CMs compared to wt cells. cTNT (green) marks cardiomyocytes. Nuclei are stained with Hoechst 33258 (blue). Scale bars, 12.5  $\mu$ m.

**D** qRT-PCR analysis of pro-apoptotic genes and white adipocytic markers shows similar expression levels in wt and PKP2<sup>mut</sup> CMs over time in culture in adipogenic medium. Brown/beige adipocytic markers were upregulated in PKP2<sup>mut</sup> compared to wt cells;  $n = 3$ ; \* $P < 0.05$ , \*\* $P < 0.01$  vs. wt CMs;  $t$ -test.

**E** Brown/beige adipocyte-specific genes were similarly upregulated in PKP2<sup>mut</sup> CMs at 28 days in culture in adipogenic medium and wt iPSC-derived brown/beige adipocytes at day 20 of differentiation compared to wt CMs as determined by qRT-PCR;  $n = 3$ ; \* $P < 0.05$ , \*\* $P < 0.01$ , \*\*\* $P < 0.001$  vs. wt;  $t$ -test.

**F** qRT-PCR analysis of indicated genes shows similar activation in PKP2<sup>mut</sup> CMs and day-20 iPSC-derived brown/beige adipocytes after treatment with 1 mM 8-Br-cAMP for 48 h. Expression values are relative to basal conditions before treatment in each group;  $n = 3$ ; \* $P < 0.05$ , \*\* $P < 0.01$ , \*\*\* $P < 0.001$  vs. corresponding PKP2<sup>mut</sup> CMs or brown/beige adipocytes at basal conditions;  $t$ -test.

Data information: All data are shown as means  $\pm$  SEM.

Source data are available online for this figure.

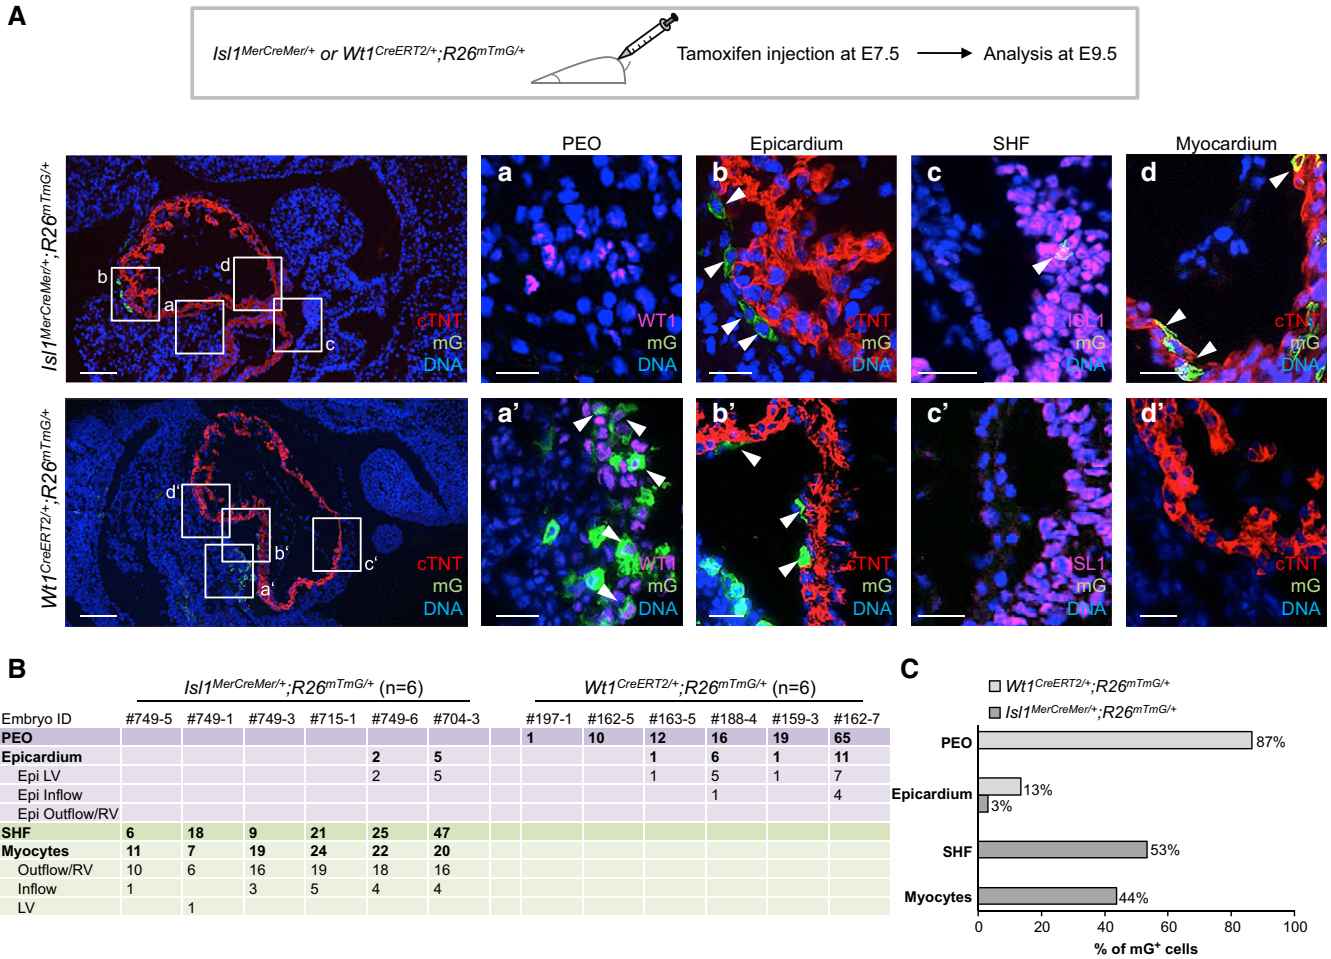

**Figure EV2. Localization and quantification of mG-labeled cells in *Isl1<sup>MerCreMer/+</sup>;R26<sup>mTmG/+</sup>* and *Wt1<sup>CreERT2/+</sup>;R26<sup>mTmG/+</sup>* mouse embryos at E9.5.**

**A** Temporal restriction of Cre-mediated labeling of *Isl1*<sup>+</sup> and *Wt1*<sup>+</sup> progenitors and their derivatives using tamoxifen-inducible *Isl1<sup>MerCreMer/+</sup>;R26<sup>mTmG/+</sup>* and *Wt1<sup>CreERT2/+</sup>;R26<sup>mTmG/+</sup>* mouse lines. Labeling was induced by tamoxifen treatment at E7.5, and embryos were analyzed at E9.5. Immunostaining of cTNT (red), *Wt1* (magenta), and mG (green) in *Isl1<sup>MerCreMer/+</sup>;R26<sup>mTmG/+</sup>* (upper panels) and *Wt1<sup>CreERT2/+</sup>;R26<sup>mTmG/+</sup>* (lower panels). The boxed regions in the left panels are shown in higher magnification (in consecutive sections) in the four right panels a–d and a'–d' for *Isl1<sup>MerCreMer/+</sup>;R26<sup>mTmG/+</sup>* and *Wt1<sup>CreERT2/+</sup>;R26<sup>mTmG/+</sup>*, respectively. *Isl1<sup>MerCreMer/+</sup>*-mediated mG labeling was absent in the PEO (a), but it was observed in epicardial cells (b), *Isl1*<sup>+</sup> SHF progenitors (c), and CMs (d), as indicated by arrows. *Wt1<sup>CreERT2/+</sup>*-mediated mG labeling was detected in *Wt1*<sup>+</sup> cells of the PEO (a') and in epicardial cells (b'), as indicated by arrows; mG expression was absent in *Isl1*<sup>+</sup> SHF progenitors (c') and CMs (d'). Scale bars, 100  $\mu$ m (left panels), 25  $\mu$ m (right panels).

**B** Table summarizing the regional distribution and number of mG-labeled cells in *Isl1<sup>MerCreMer/+</sup>;R26<sup>mTmG/+</sup>* and *Wt1<sup>CreERT2/+</sup>;R26<sup>mTmG/+</sup>* mouse embryos at E9.5 as determined in (A). Epi, epicardium; LV, left ventricle; RV, right ventricle.

**C** Bar graph depicting the percentage of the regional distribution (PEO, epicardium, SHF and myocardium) of mG<sup>+</sup> cells in *Isl1<sup>MerCreMer/+</sup>;R26<sup>mTmG/+</sup>* and *Wt1<sup>CreERT2/+</sup>;R26<sup>mTmG/+</sup>* mouse embryos at E9.5. Major contribution of *Isl1*-derivatives was detected in the SHF and myocardium, while most *Wt1*-derivatives were found in the PEO. Both *Isl1*- and *Wt1*-expressing progenitors contributed to the epicardium.

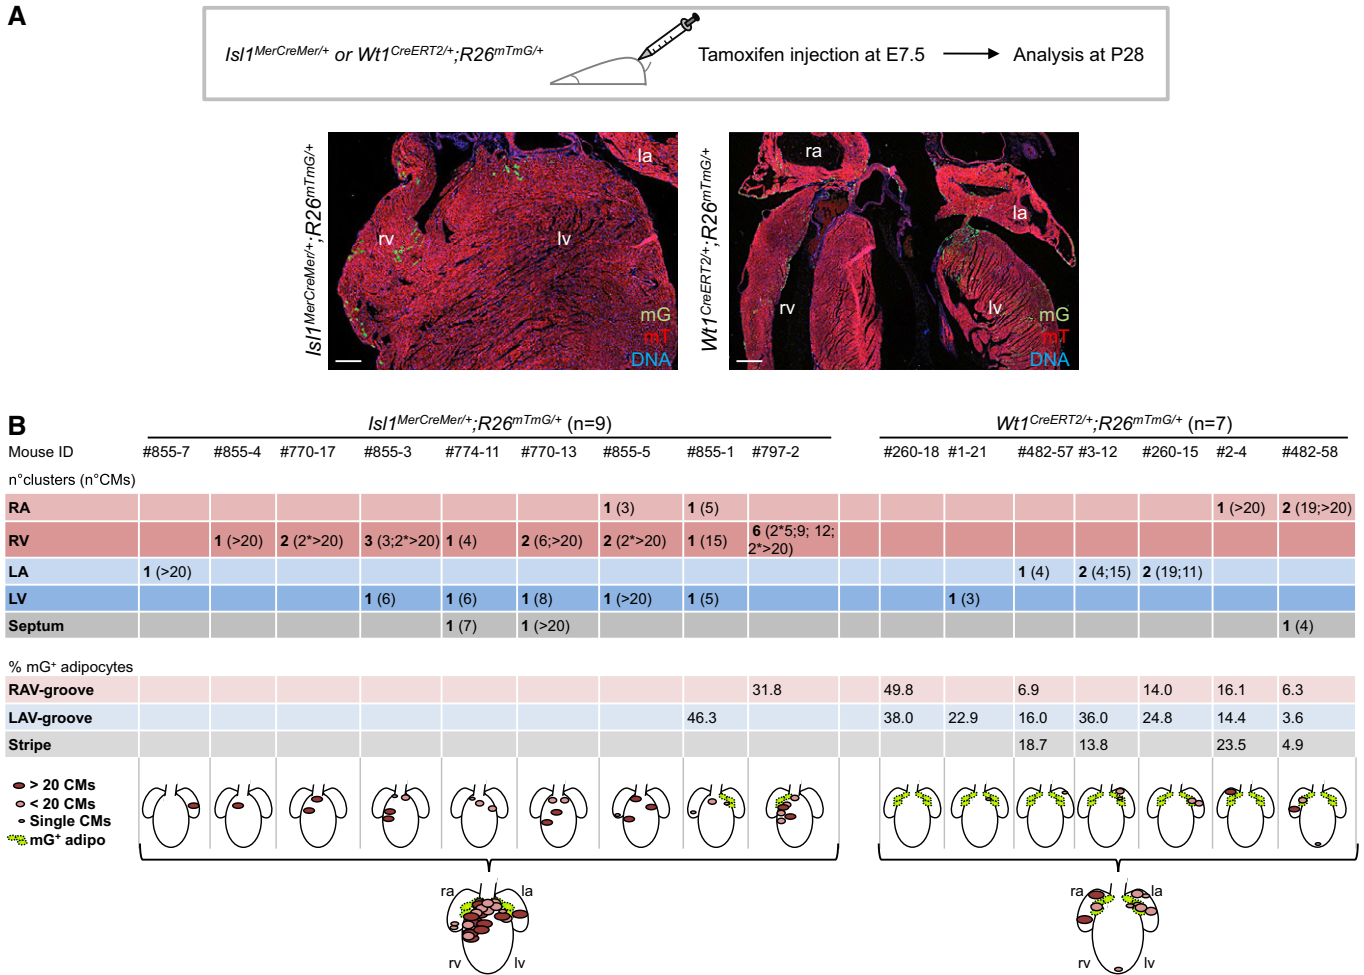

**Figure EV3. Localization and quantification of mG-labeled cells in  $Isl1^{MerCreMer/+};R26^{mTmG/+}$  and  $Wt1^{CreERT2/+};R26^{mTmG/+}$  adult mouse hearts at P28.**

A Temporal restriction of Cre-mediated labeling of  $Isl1^+$  and  $Wt1^+$  progenitors and their derivatives using tamoxifen-inducible  $Isl1^{MerCreMer/+};R26^{mTmG/+}$  and  $Wt1^{CreERT2/+};R26^{mTmG/+}$  mouse lines. Labeling was induced by tamoxifen treatment at E7.5, and adult mouse hearts were analyzed at postnatal day 28 (P28). Immunostaining of mG (green) and mT (red) of  $Isl1^{MerCreMer/+};R26^{mTmG/+}$  (left panel) and  $Wt1^{CreERT2/+};R26^{mTmG/+}$  (right panel). Nuclei are stained with Hoechst 33258. Scale bars, 100  $\mu$ m. la, left atrium; lv, left ventricle; ra, right atrium; rv, right ventricle.

B Table depicting the regional distribution and the amount of the mG-labeled CMs (as number of clusters and CM number/cluster) and adipocytes (as percentage of total AV groove adipocytes) in  $Isl1^{MerCreMer/+};R26^{mTmG/+}$  and  $Wt1^{CreERT2/+};R26^{mTmG/+}$  adult mouse hearts at P28. Shown are schematic representations of the distribution of mG-expressing cells per each analyzed heart and as a summarized overview for each line. Size of CM clusters is illustrated. LA, left atrium; LAV, left atrioventricular; LV, left ventricle; RA, right atrium; RAV, right atrioventricular; RV, right ventricle.

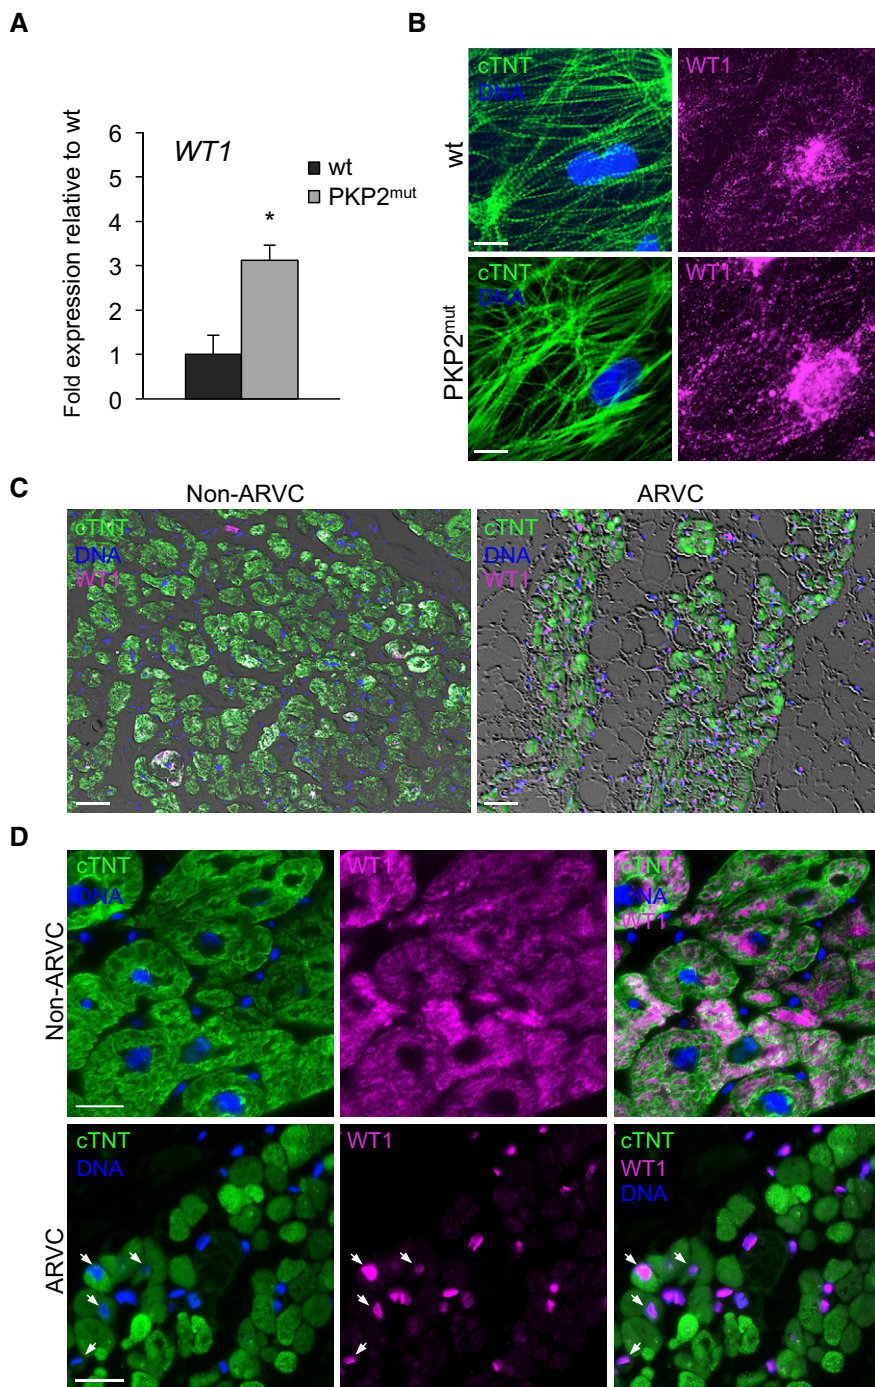

**Figure EV4. Upregulated expression and aberrant subcellular localization of WT1 in iPSC-derived PKP2<sup>mut</sup> CMs and native cardiac muscle cells from ARVC patient heart samples.**

**A** qRT-PCR analysis of *WT1* reveals elevated expression levels in iPSC-derived PKP2<sup>mut</sup> compared to wt CMs;  $n = 3$ ;  $*P < 0.05$  vs. wt; t-test. Data are shown as means  $\pm$  SEM.

**B** Immunostaining of cTNT (green) and WT1 (magenta) in wt and PKP2<sup>mut</sup> iPSC-derived CMs. Note the filamentous-like pattern of WT1 cytosolic expression. Nuclei are stained with Hoechst 33258 (blue). Scale bars, 25  $\mu$ m.

**C, D** Analysis of adult human myocardium from patients affected and non-affected by ARVC after immunostaining for cTNT (green) and WT1 (magenta). Nuclei are stained with Hoechst 33258 (blue). Low magnification of phase-contrast images merged with immunofluorescence signals are shown in (C). Note intramyocardial fat infiltrations in ARVC conditions. Scale bars, 50  $\mu$ m. High magnification images demonstrate nuclear localization of WT1 in CMs of ARVC patients (arrows), whereas in non-ARVC individuals only cytosolic WT1 could be detected (D). Scale bars, 25  $\mu$ m.

Source data are available online for this figure.

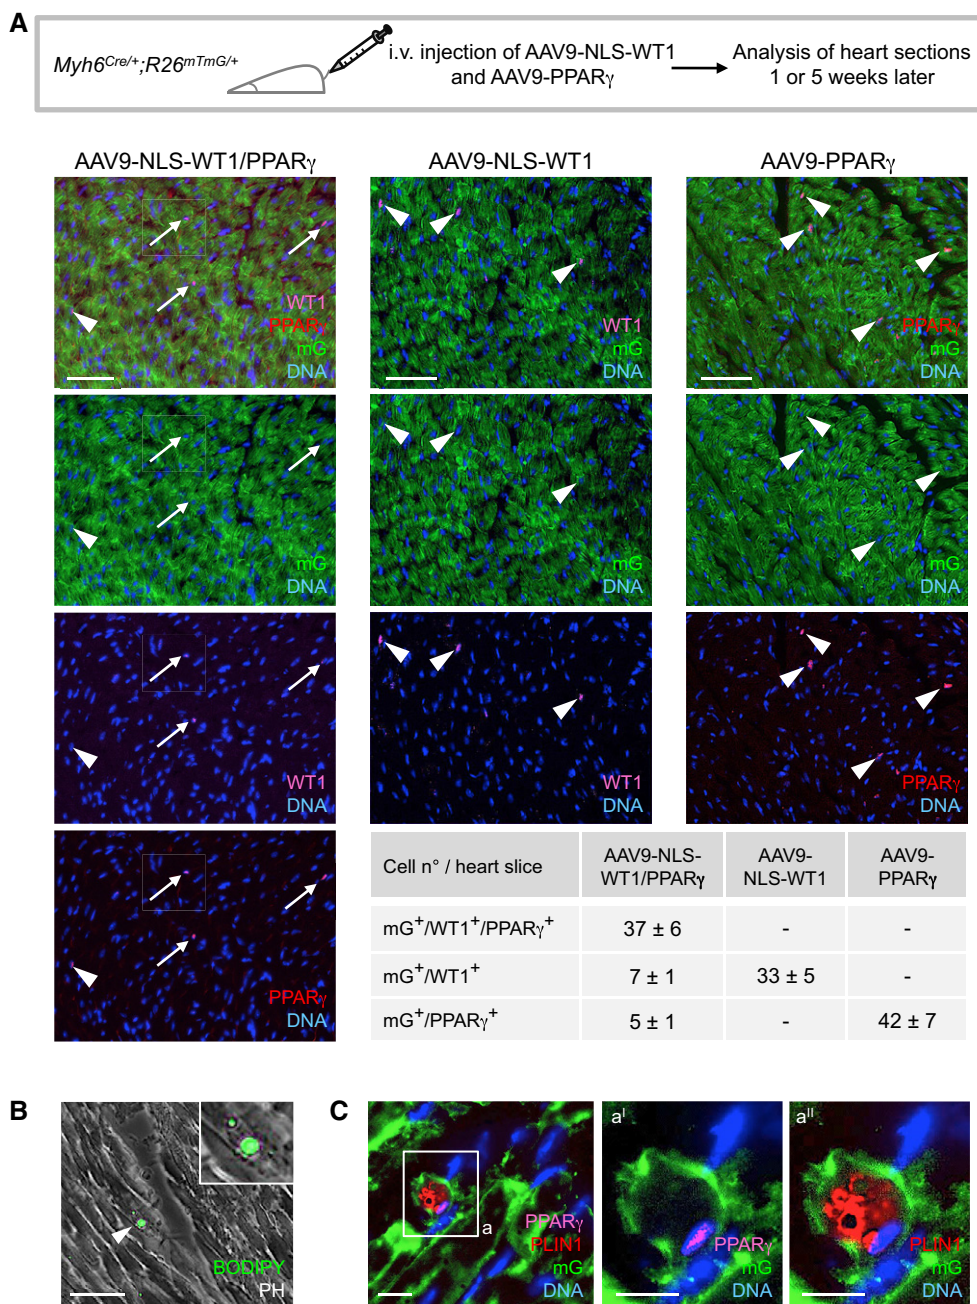

**Figure EV5. Forced expression of PPAR $\gamma$  and WT1 drives adipocytic conversion of mouse adult CMs *in vivo*.**

- A** Scheme of experimental setup for injection of adeno-associated virus serotype 9 (AAV9) encoding NLS-WT1 (AAV9-NLS-WT1) and PPAR $\gamma$  (AAV9-NLS-PPAR $\gamma$ ) in *Myh6<sup>Cre/+</sup>;R26<sup>mTmG/+</sup>* mice and their analysis after 1 or 5 weeks.  $2.5 \times 10^{12}$  virus particles were injected intravenously via tail vein. Representative immunostainings of heart sections after 1-week injection of each virus alone or in combination show CMs expressing the lineage marker mG (green) and the WT1 (cyan) and PPAR $\gamma$  (red) transgenes. Nuclei are stained with Hoechst 33258. Arrowheads and arrows indicate mG<sup>+</sup> CMs infected with one or both viruses, respectively. Scale bars, 50  $\mu$ m. Quantification of transgene expressing mG<sup>+</sup> CMs reveals high rate of co-transduction. Three random heart slices per mouse and three mice per virus condition were analyzed.
- B, C** Analysis of heart sections 5 weeks after infection with AAV9-NLS-WT1 and AAV9-PPAR $\gamma$ . (B) shows a representative phase-contrast (PH) image merged with BODIPY fluorescence signal (green) visualizing a lipid-filled cell within the myocardium of a mouse that received both viruses. Higher magnification is shown in the inset. Scale bar, 50  $\mu$ m. Note that BODIPY<sup>+</sup> cells with enlarged multilocular lipid droplets were detected exclusively in the heart of mice infected with both AAV9-NLS-WT1 and AAV9-PPAR $\gamma$  at a frequency of 3–5 cells per heart section. Arrowhead indicates a BODIPY<sup>+</sup> cell. In (C), subsequent immunofluorescence detection of mG (green), PPAR $\gamma$  (magenta), and the adipocyte marker PLIN1 (red) ultimately identifies infected CMs that underwent adipocytic conversion solely in mice treated with both viruses. Scale bar, 10  $\mu$ m. The boxed region is shown in higher magnification (panels a' and a''). Scale bars, 25  $\mu$ m.

Source data are available online for this figure.
